# Supplementary material for: Chiral diketopyrrolopyrrole dyes showing light emission in solid and aggregate states
Source: Royal Society of Chemistry journal article supplement (doi:10.1039/d3tc00308f), 2023-01-01
Supplement: d3tc00308f1.pdf [file d3tc00308f1.pdf]

# SUPPORTING INFORMATION

## Chiral diketopyrrolopyrrolo dyes with light emission from solid and aggregate states

Maurizio Mastropasqua Talamo,<sup>\*a</sup> Thomas Cauchy,<sup>a</sup> Flavia Pop,<sup>\*a</sup> Francesco Zinna,<sup>b</sup> Lorenzo Di Bari<sup>b</sup> and Narcis Avarvari<sup>\*a</sup>

<sup>a</sup> *Univ Angers, CNRS, MOLTECH-Anjou, SFR MATRIX, F-49000 Angers, France.*

<sup>b</sup> *Dipartimento di Chimica e Chimica Industriale, Università di Pisa, via G. Moruzzi 13, 56124, Pisa, Italy.*

E-mail: [maurizio.mastropasquatalamo@univ-angers.fr](mailto:maurizio.mastropasquatalamo@univ-angers.fr); [flavia.pop@univ-angers.fr](mailto:flavia.pop@univ-angers.fr);  
[narcis.avarvari@univ-angers.fr](mailto:narcis.avarvari@univ-angers.fr)

## Summary

|                                                |    |
|------------------------------------------------|----|
| NMR spectra .....                              | 2  |
| X-ray structure determinations .....           | 6  |
| Compound <b>3RR</b> .....                      | 6  |
| Compound <b>8</b> .....                        | 10 |
| DFT and TD-DFT calculations .....              | 13 |
| Compound <b>2RR</b> .....                      | 13 |
| Compound <b>2SS</b> .....                      | 19 |
| Compound <b>3RR</b> .....                      | 24 |
| Compound <b>3SS</b> .....                      | 27 |
| Compound <b>8</b> .....                        | 30 |
| UV-vis spectroscopy and CPL measurements ..... | 34 |

## NMR spectra

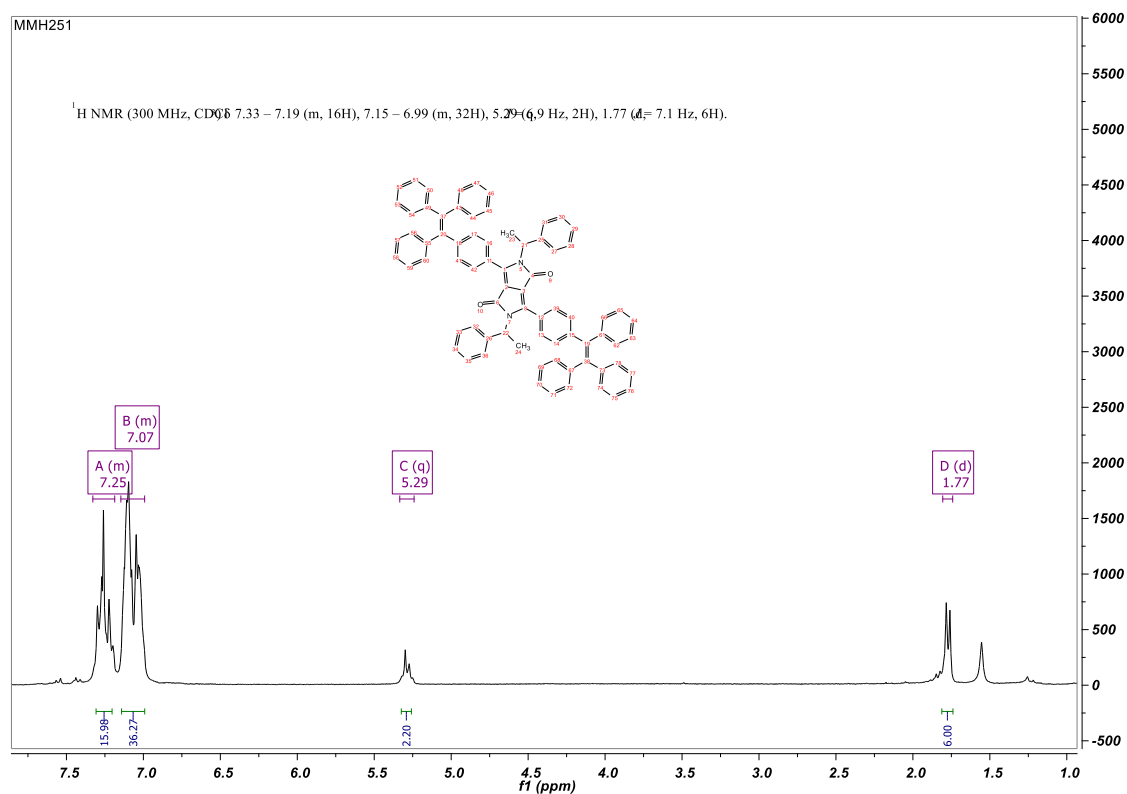

Fig. S1  $^1\text{H}$ -NMR spectrum of compound **3RR** in  $\text{CDCl}_3$ .

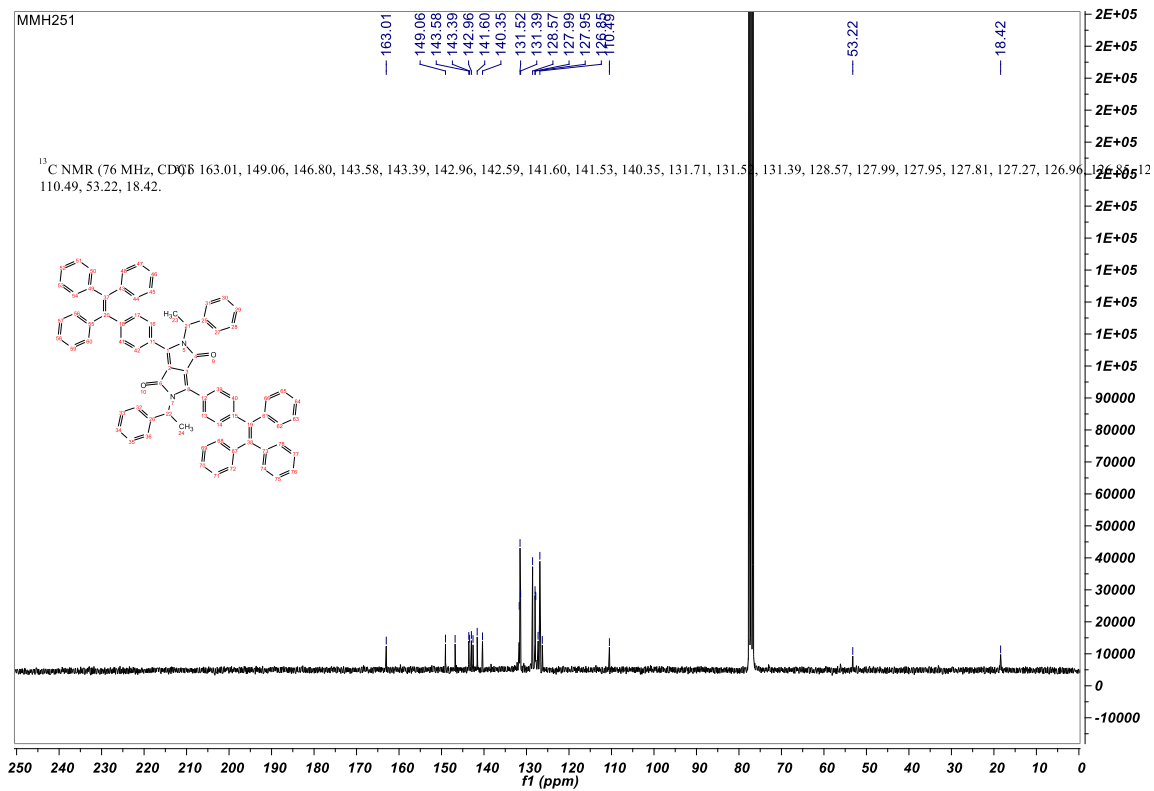

Fig. S2  $^{13}\text{C}$ -NMR spectrum of compound **3RR** in  $\text{CDCl}_3$ .

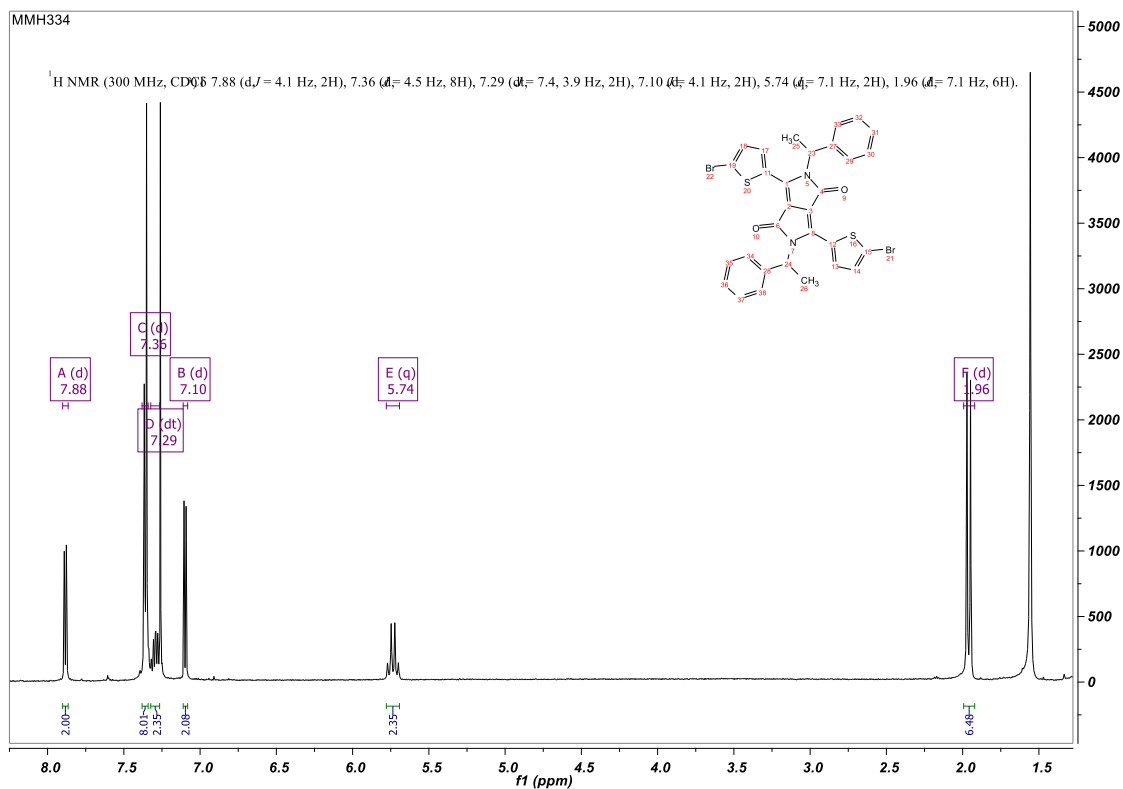

**Fig. S3** <sup>1</sup>H-NMR spectrum of compound **5RR** in CDCl<sub>3</sub>.

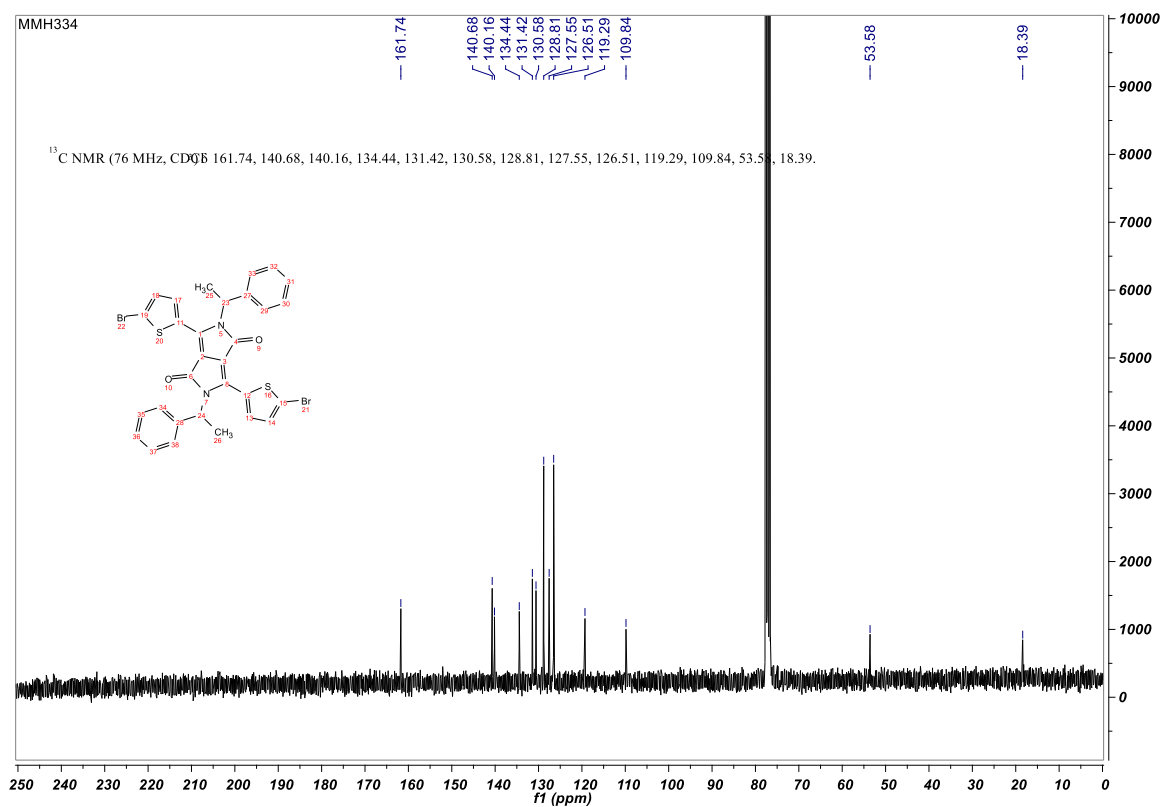

**Fig. S4** <sup>13</sup>C-NMR spectrum of compound **5RR** in CDCl<sub>3</sub>.

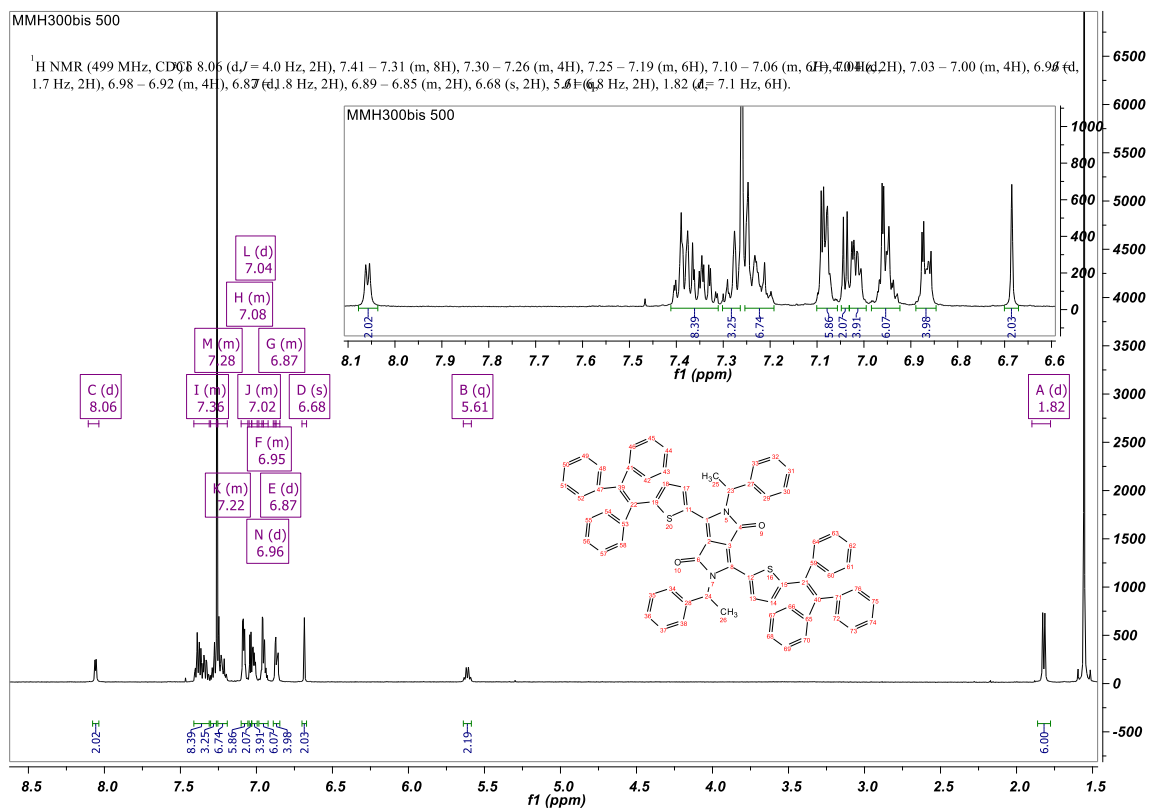

Fig. S5 <sup>1</sup>H-NMR spectrum of compound **6RR** in CDCl<sub>3</sub>, with a zoom on the aromatic area in the inset.

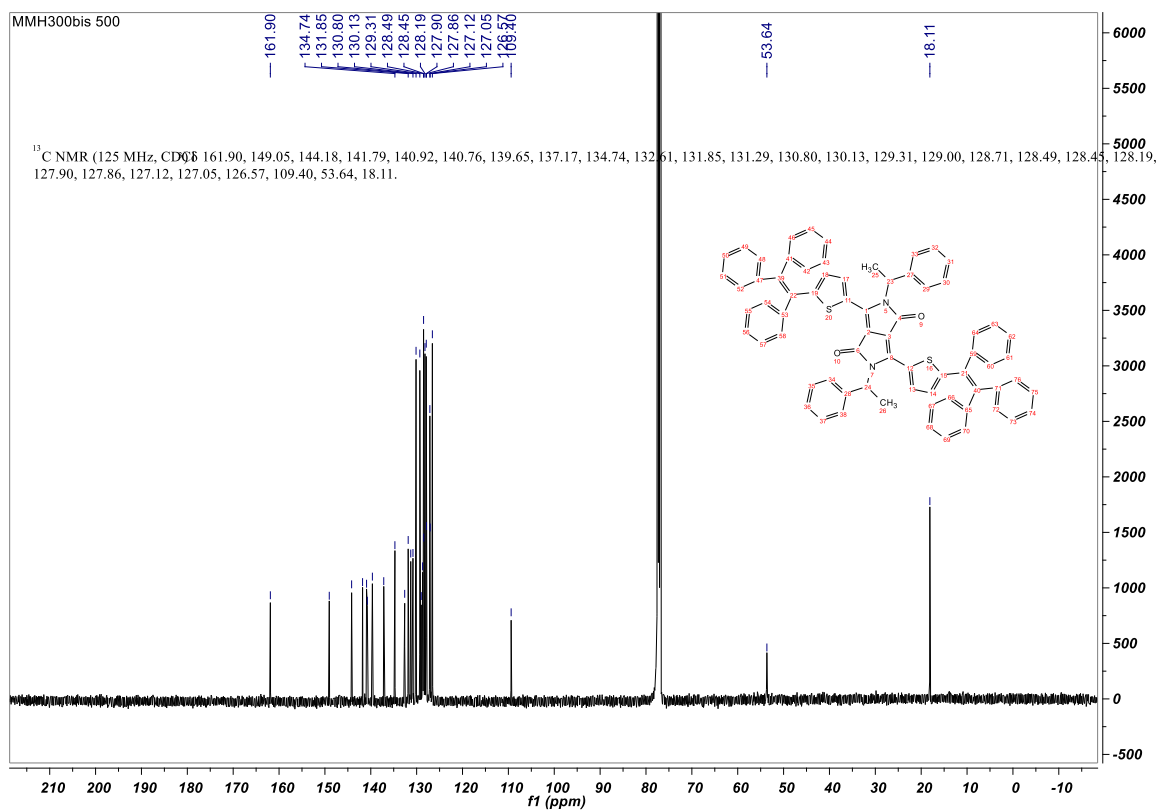

Fig. S6 <sup>13</sup>C-NMR spectrum of compound **6RR** in CDCl<sub>3</sub>.

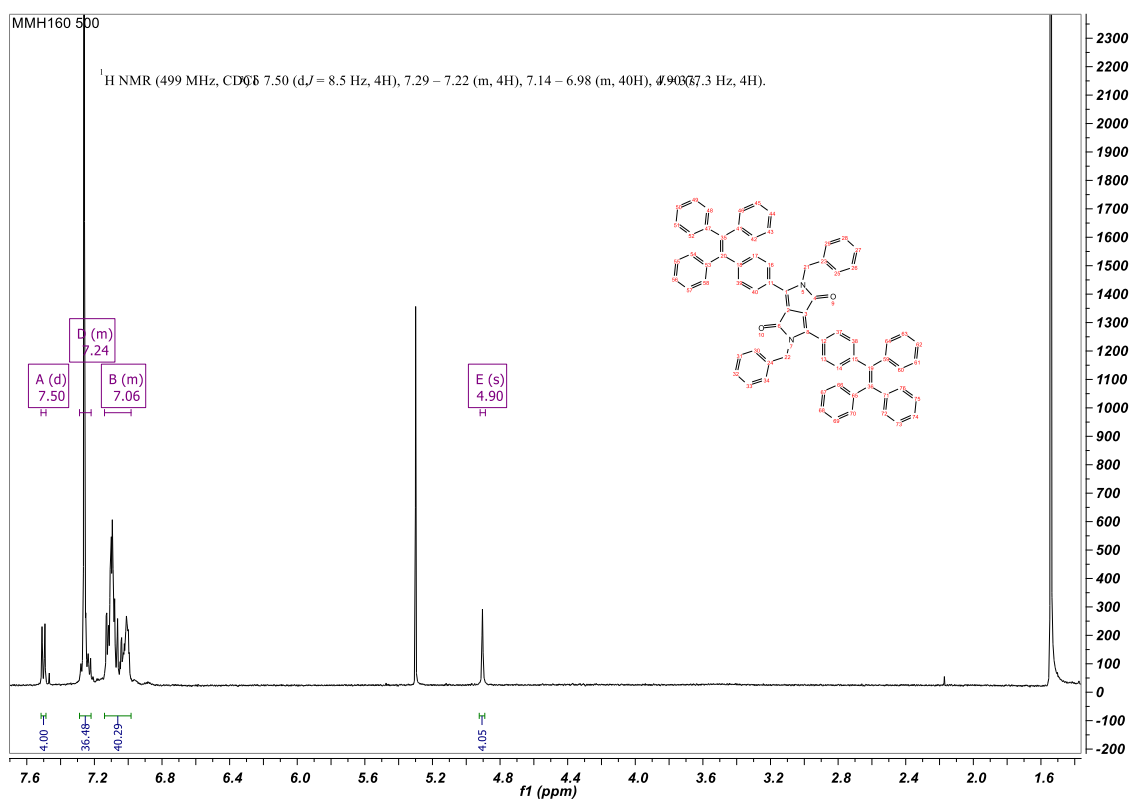

Fig. S7  $^1\text{H-NMR}$  spectrum of compound 8 in  $\text{CDCl}_3$ .

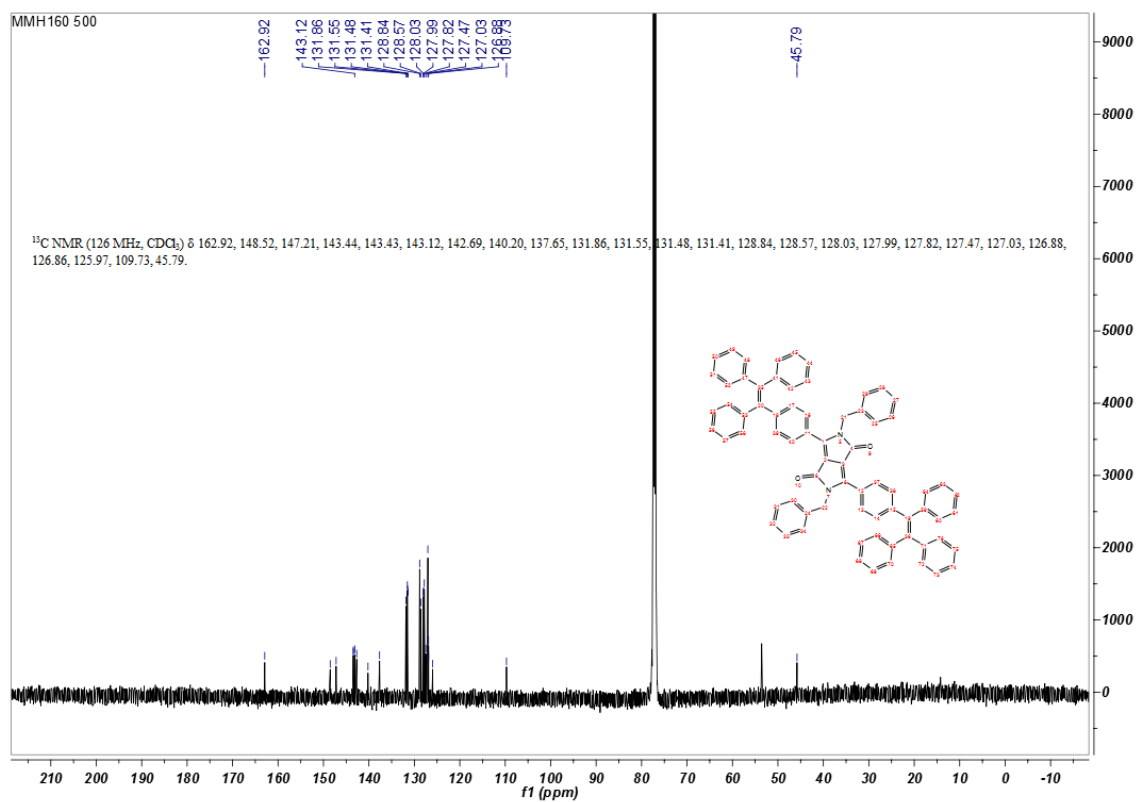

Fig. S8  $^{13}\text{C-NMR}$  spectrum of compound 8 in  $\text{CDCl}_3$ .

## X-ray structure determinations

### Compound **3RR**

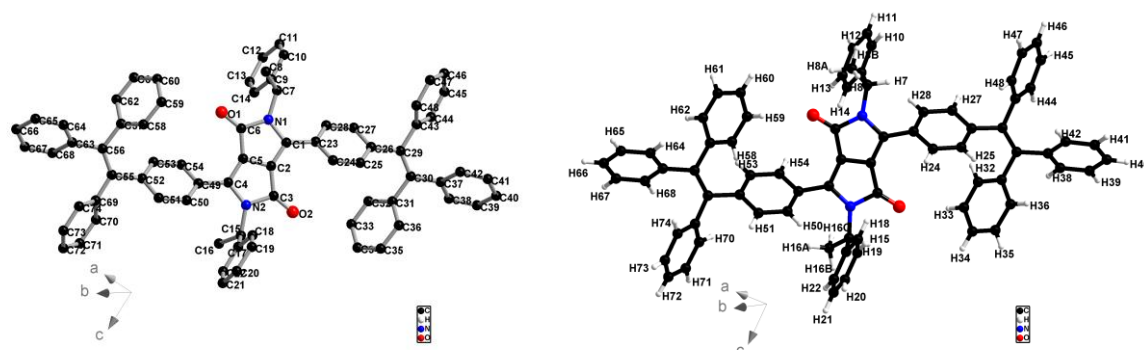

**Fig. S9** Molecular structure of compound **3RR** in the crystal phase, as result of single crystal X-ray diffraction experiment, with atom numbering (hydrogen omitted for clarity in the left picture, and shown separately in the right one).

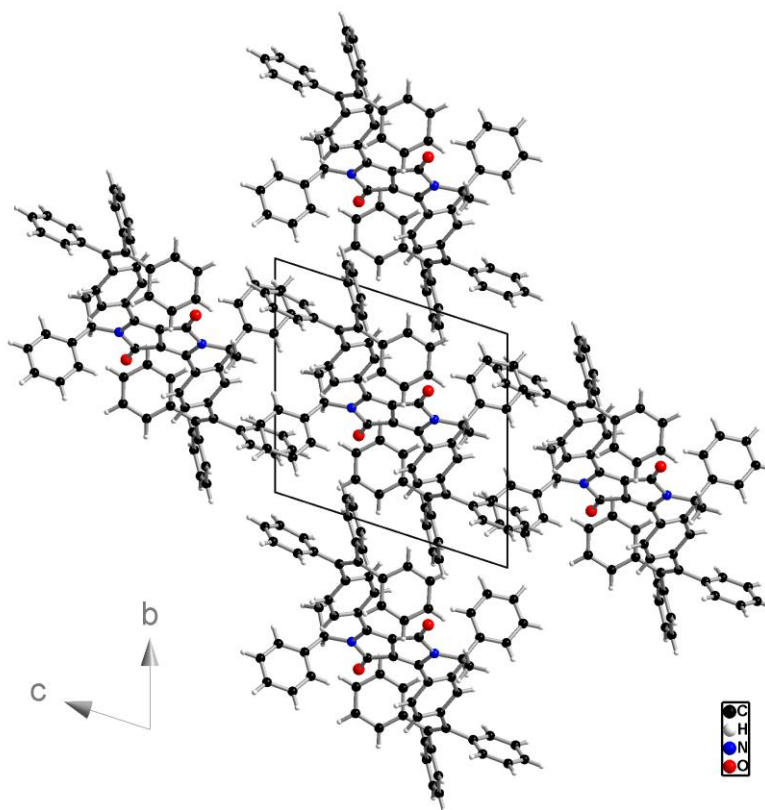

**Fig. S10** Crystal packing of compound **3RR** in the crystal phase, as result of single crystal X-ray diffraction experiment.

**Table S1** Detailed crystallographic data.

|                             | <b>3RR</b>                                                    | <b>8</b>                                                      |
|-----------------------------|---------------------------------------------------------------|---------------------------------------------------------------|
| Chemical formula            | C <sub>74</sub> H <sub>56</sub> N <sub>2</sub> O <sub>2</sub> | C <sub>72</sub> H <sub>52</sub> N <sub>2</sub> O <sub>2</sub> |
| <i>M<sub>r</sub></i>        | 1005.20                                                       | 977.23                                                        |
| Crystal system, space group | Triclinic, <i>P</i> 1                                         | Triclinic, <i>P</i> -1                                        |

|                                                                                             |                                                                  |                                                                 |
|---------------------------------------------------------------------------------------------|------------------------------------------------------------------|-----------------------------------------------------------------|
| Temperature (K)                                                                             | 295.0(1)                                                         | 150.00(10)                                                      |
| <i>a</i> , <i>b</i> , <i>c</i> (Å)                                                          | 9.6227(6), 11.8766(7), 12.5108(7)                                | 9.5751(8), 11.3199(9), 12.5471(10)                              |
| $\alpha$ , $\beta$ , $\gamma$ (°)                                                           | 71.825(5), 82.689(5), 87.595(5)                                  | 72.459(7), 83.128(6), 84.843(6)                                 |
| <i>V</i> (Å <sup>3</sup> )                                                                  | 1347.41(14)                                                      | 1285.34(18)                                                     |
| <i>Z</i>                                                                                    | 1                                                                | 1                                                               |
| $\rho_{\text{calc}}$ (g.cm <sup>-3</sup> )                                                  | 1.239                                                            | 1.2624                                                          |
| $\mu$ (Cu <i>K</i> $\alpha$ ) (mm <sup>-1</sup> )                                           | 0.567                                                            | 0.581                                                           |
| No. of measured, independent and observed [ <i>I</i> > 2 $\sigma$ ( <i>I</i> )] reflections | 19767 / 9494                                                     | 9638 / 4845                                                     |
| Flack parameter                                                                             | 0.0(7)                                                           | -                                                               |
| <i>R</i> <sub>int</sub>                                                                     | 0.0448                                                           | 0.0438                                                          |
| <i>R</i> [ <i>I</i> > 2 $\sigma$ ( <i>I</i> )]                                              | <i>R</i> <sub>1</sub> = 0.0432, <i>wR</i> <sub>2</sub> = 0.0962, | <i>R</i> <sub>1</sub> = 0.0471, <i>wR</i> <sub>2</sub> = 0.1039 |
| <i>wR</i> ( <i>F</i> <sup>2</sup> ), all data                                               | <i>wR</i> <sub>2</sub> = 0.1099                                  | <i>wR</i> <sub>2</sub> = 0.1190                                 |
| <i>S</i> ( <i>F</i> <sup>2</sup> ), <sup>c</sup> all data                                   | 0.884                                                            | 1.045                                                           |
| CCDC number                                                                                 | 2237602                                                          | 2237603                                                         |

**Table S2** Bond Lengths for compound **3RR** in the crystal phase.

| Atoms 1,2 | <i>d</i> 1,2 [Å] | Atoms 1,2 | <i>d</i> 1,2 [Å] |
|-----------|------------------|-----------|------------------|
| C1—C2     | 1.369(8)         | C35—H35   | 0.9300           |
| C1—N1     | 1.404(7)         | C36—H36   | 0.9300           |
| C1—C23    | 1.462(7)         | C37—C38   | 1.374(9)         |
| C2—C5     | 1.411(4)         | C37—C42   | 1.408(9)         |
| C2—C3     | 1.440(8)         | C38—C39   | 1.396(8)         |
| C3—O2     | 1.212(7)         | C38—H38   | 0.9300           |
| C3—N2     | 1.444(6)         | C39—C40   | 1.381(11)        |
| C4—C5     | 1.371(7)         | C39—H39   | 0.9300           |
| C4—N2     | 1.391(7)         | C40—C41   | 1.374(11)        |
| C4—C49    | 1.477(7)         | C40—H40   | 0.9300           |
| C5—C6     | 1.456(8)         | C41—C42   | 1.383(9)         |
| C6—O1     | 1.229(7)         | C41—H41   | 0.9300           |
| C6—N1     | 1.419(6)         | C42—H42   | 0.9300           |
| C7—N1     | 1.473(7)         | C43—C44   | 1.39(1)          |
| C7—C9     | 1.497(9)         | C43—C48   | 1.393(10)        |
| C7—C8     | 1.540(8)         | C44—C45   | 1.378(10)        |
| C7—H7     | 0.9800           | C44—H44   | 0.9300           |
| C8—H8A    | 0.9600           | C45—C46   | 1.377(14)        |
| C8—H8B    | 0.9600           | C45—H45   | 0.9300           |
| C8—H8C    | 0.9600           | C46—C47   | 1.375(15)        |
| C9—C10    | 1.374(8)         | C46—H46   | 0.9300           |
| C9—C14    | 1.377(9)         | C47—C48   | 1.384(10)        |
| C10—C11   | 1.427(10)        | C47—H47   | 0.9300           |
| C10—H10   | 0.9300           | C48—H48   | 0.9300           |
| C11—C12   | 1.358(11)        | C49—C54   | 1.380(8)         |
| C11—H11   | 0.9300           | C49—C50   | 1.392(8)         |
| C12—C13   | 1.379(9)         | C50—C51   | 1.388(7)         |
| C12—H12   | 0.9300           | C50—H50   | 0.9300           |
| C13—C14   | 1.38(1)          | C51—C52   | 1.382(8)         |
| C13—H13   | 0.9300           | C51—H51   | 0.9300           |
| C14—H14   | 0.9300           | C52—C53   | 1.391(8)         |
| C15—N2    | 1.478(7)         | C52—C55   | 1.535(7)         |
| C15—C16   | 1.493(8)         | C53—C54   | 1.396(7)         |
| C15—C17   | 1.526(9)         | C53—H53   | 0.9300           |
| C15—H15   | 0.9800           | C54—H54   | 0.9300           |
| C16—H16A  | 0.9600           | C55—C56   | 1.366(9)         |

|          |           |         |           |
|----------|-----------|---------|-----------|
| C16—H16B | 0.9600    | C55—C69 | 1.450(8)  |
| C16—H16C | 0.9600    | C56—C57 | 1.502(8)  |
| C17—C18  | 1.362(9)  | C56—C63 | 1.504(8)  |
| C17—C22  | 1.407(8)  | C57—C58 | 1.385(9)  |
| C18—C19  | 1.378(9)  | C57—C62 | 1.404(10) |
| C18—H18  | 0.9300    | C58—C59 | 1.380(9)  |
| C19—C20  | 1.384(10) | C58—H58 | 0.9300    |
| C19—H19  | 0.9300    | C59—C60 | 1.358(12) |
| C20—C21  | 1.372(11) | C59—H59 | 0.9300    |
| C20—H20  | 0.9300    | C60—C61 | 1.412(12) |
| C21—C22  | 1.328(10) | C60—H60 | 0.9300    |
| C21—H21  | 0.9300    | C61—C62 | 1.35(1)   |
| C22—H22  | 0.9300    | C61—H61 | 0.9300    |
| C23—C24  | 1.393(8)  | C62—H62 | 0.9300    |
| C23—C28  | 1.400(8)  | C63—C68 | 1.372(9)  |
| C24—C25  | 1.370(7)  | C63—C64 | 1.39(1)   |
| C24—H24  | 0.9300    | C64—C65 | 1.393(8)  |
| C25—C26  | 1.393(8)  | C64—H64 | 0.9300    |
| C25—H25  | 0.9300    | C65—C66 | 1.338(11) |
| C26—C27  | 1.399(8)  | C65—H65 | 0.9300    |
| C26—C29  | 1.489(7)  | C66—C67 | 1.413(12) |
| C27—C28  | 1.383(7)  | C66—H66 | 0.9300    |
| C27—H27  | 0.9300    | C67—C68 | 1.368(9)  |
| C28—H28  | 0.9300    | C67—H67 | 0.9300    |
| C29—C30  | 1.350(8)  | C68—H68 | 0.9300    |
| C29—C43  | 1.494(8)  | C69—C70 | 1.372(10) |
| C30—C37  | 1.488(7)  | C69—C74 | 1.395(9)  |
| C30—C31  | 1.494(8)  | C70—C71 | 1.378(9)  |
| C31—C36  | 1.383(9)  | C70—H70 | 0.9300    |
| C31—C32  | 1.403(9)  | C71—C72 | 1.344(12) |
| C32—C33  | 1.372(9)  | C71—H71 | 0.9300    |
| C32—H32  | 0.9300    | C72—C73 | 1.386(13) |
| C33—C34  | 1.373(11) | C72—H72 | 0.9300    |
| C33—H33  | 0.9300    | C73—C74 | 1.383(9)  |
| C34—C35  | 1.358(11) | C73—H73 | 0.9300    |
| C34—H34  | 0.9300    | C74—H74 | 0.9300    |
| C35—C36  | 1.415(10) |         |           |

**Table S3** Bond Angles for compound **3RR** in the crystal phase.

| Atoms 1,2,3 | Angle 1,2,3 [°] | Atoms 1,2,3 | Angle 1,2,3 [°] |
|-------------|-----------------|-------------|-----------------|
| C2—C1—N1    | 107.4(4)        | C38—C37—C42 | 119.1(5)        |
| C2—C1—C23   | 126.8(5)        | C38—C37—C30 | 121.0(5)        |
| N1—C1—C23   | 125.8(5)        | C42—C37—C30 | 119.7(6)        |
| C1—C2—C5    | 110.3(4)        | C37—C38—C39 | 120.2(6)        |
| C1—C2—C3    | 140.7(5)        | C37—C38—H38 | 119.900         |
| C5—C2—C3    | 108.9(3)        | C39—C38—H38 | 119.900         |
| O2—C3—C2    | 133.8(5)        | C40—C39—C38 | 120.8(7)        |
| O2—C3—N2    | 122.8(5)        | C40—C39—H39 | 119.600         |
| C2—C3—N2    | 103.4(4)        | C38—C39—H39 | 119.600         |
| C5—C4—N2    | 108.0(4)        | C41—C40—C39 | 118.9(6)        |
| C5—C4—C49   | 125.4(5)        | C41—C40—H40 | 120.600         |
| N2—C4—C49   | 126.5(5)        | C39—C40—H40 | 120.600         |
| C4—C5—C2    | 109.1(4)        | C40—C41—C42 | 121.3(7)        |
| C4—C5—C6    | 143.7(5)        | C40—C41—H41 | 119.300         |
| C2—C5—C6    | 107.2(3)        | C42—C41—H41 | 119.300         |
| O1—C6—N1    | 122.8(5)        | C41—C42—C37 | 119.7(7)        |
| O1—C6—C5    | 132.3(5)        | C41—C42—H42 | 120.200         |
| N1—C6—C5    | 104.8(4)        | C37—C42—H42 | 120.200         |
| N1—C7—C9    | 112.9(5)        | C44—C43—C48 | 117.8(6)        |
| N1—C7—C8    | 111.8(4)        | C44—C43—C29 | 122.5(6)        |
| C9—C7—C8    | 113.2(5)        | C48—C43—C29 | 119.7(6)        |
| N1—C7—H7    | 106.100         | C45—C44—C43 | 121.6(8)        |
| C9—C7—H7    | 106.100         | C45—C44—H44 | 119.200         |
| C8—C7—H7    | 106.100         | C43—C44—H44 | 119.200         |
| C7—C8—H8A   | 109.500         | C46—C45—C44 | 119.9(8)        |



|               |          |             |          |
|---------------|----------|-------------|----------|
| C7—C8—H8B     | 109.500  | C46—C45—H45 | 120.000  |
| H8A—C8—H8B    | 109.500  | C44—C45—H45 | 120.000  |
| C7—C8—H8C     | 109.500  | C47—C46—C45 | 119.5(7) |
| H8A—C8—H8C    | 109.500  | C47—C46—H46 | 120.300  |
| H8B—C8—H8C    | 109.500  | C45—C46—H46 | 120.300  |
| C10—C9—C14    | 118.1(7) | C46—C47—C48 | 120.8(9) |
| C10—C9—C7     | 118.2(6) | C46—C47—H47 | 119.600  |
| C14—C9—C7     | 123.7(5) | C48—C47—H47 | 119.600  |
| C9—C10—C11    | 119.8(7) | C47—C48—C43 | 120.4(8) |
| C9—C10—H10    | 120.100  | C47—C48—H48 | 119.800  |
| C11—C10—H10   | 120.100  | C43—C48—H48 | 119.800  |
| C12—C11—C10   | 120.7(6) | C54—C49—C50 | 117.5(5) |
| C12—C11—H11   | 119.700  | C54—C49—C4  | 117.6(5) |
| C10—C11—H11   | 119.700  | C50—C49—C4  | 124.7(5) |
| C11—C12—C13   | 119.1(7) | C51—C50—C49 | 121.1(5) |
| C11—C12—H12   | 120.400  | C51—C50—H50 | 119.500  |
| C13—C12—H12   | 120.400  | C49—C50—H50 | 119.500  |
| C12—C13—C14   | 120.2(7) | C52—C51—C50 | 121.1(5) |
| C12—C13—H13   | 119.900  | C52—C51—H51 | 119.400  |
| C14—C13—H13   | 119.900  | C50—C51—H51 | 119.400  |
| C9—C14—C13    | 122.0(6) | C51—C52—C53 | 118.4(5) |
| C9—C14—H14    | 119.000  | C51—C52—C55 | 120.7(5) |
| C13—C14—H14   | 119.000  | C53—C52—C55 | 120.8(5) |
| N2—C15—C16    | 112.2(5) | C52—C53—C54 | 119.9(5) |
| N2—C15—C17    | 111.4(6) | C52—C53—H53 | 120.100  |
| C16—C15—C17   | 117.1(4) | C54—C53—H53 | 120.100  |
| N2—C15—H15    | 105.000  | C49—C54—C53 | 122.0(5) |
| C16—C15—H15   | 105.000  | C49—C54—H54 | 119.000  |
| C17—C15—H15   | 105.000  | C53—C54—H54 | 119.000  |
| C15—C16—H16A  | 109.500  | C56—C55—C69 | 126.7(5) |
| C15—C16—H16B  | 109.500  | C56—C55—C52 | 118.2(5) |
| H16A—C16—H16B | 109.500  | C69—C55—C52 | 115.0(5) |
| C15—C16—H16C  | 109.500  | C55—C56—C57 | 123.3(5) |
| H16A—C16—H16C | 109.500  | C55—C56—C63 | 121.7(5) |
| H16B—C16—H16C | 109.500  | C57—C56—C63 | 115.1(5) |
| C18—C17—C22   | 117.0(6) | C58—C57—C62 | 118.2(6) |
| C18—C17—C15   | 121.3(5) | C58—C57—C56 | 121.4(6) |
| C22—C17—C15   | 121.3(6) | C62—C57—C56 | 120.5(6) |
| C17—C18—C19   | 121.5(6) | C59—C58—C57 | 120.6(7) |
| C17—C18—H18   | 119.200  | C59—C58—H58 | 119.700  |
| C19—C18—H18   | 119.200  | C57—C58—H58 | 119.700  |
| C18—C19—C20   | 119.6(7) | C60—C59—C58 | 120.5(8) |
| C18—C19—H19   | 120.200  | C60—C59—H59 | 119.800  |
| C20—C19—H19   | 120.200  | C58—C59—H59 | 119.800  |
| C21—C20—C19   | 119.3(7) | C59—C60—C61 | 120.0(7) |
| C21—C20—H20   | 120.400  | C59—C60—H60 | 120.000  |
| C19—C20—H20   | 120.400  | C61—C60—H60 | 120.000  |
| C22—C21—C20   | 120.5(7) | C62—C61—C60 | 119.3(8) |
| C22—C21—H21   | 119.800  | C62—C61—H61 | 120.300  |
| C20—C21—H21   | 119.800  | C60—C61—H61 | 120.300  |
| C21—C22—C17   | 122.1(8) | C61—C62—C57 | 121.4(7) |
| C21—C22—H22   | 118.900  | C61—C62—H62 | 119.300  |
| C17—C22—H22   | 118.900  | C57—C62—H62 | 119.300  |
| C24—C23—C28   | 119.3(5) | C68—C63—C64 | 117.2(5) |
| C24—C23—C1    | 117.0(5) | C68—C63—C56 | 123.2(6) |
| C28—C23—C1    | 123.3(5) | C64—C63—C56 | 119.6(6) |
| C25—C24—C23   | 120.2(5) | C63—C64—C65 | 120.4(6) |
| C25—C24—H24   | 119.900  | C63—C64—H64 | 119.800  |
| C23—C24—H24   | 119.900  | C65—C64—H64 | 119.800  |
| C24—C25—C26   | 121.6(5) | C66—C65—C64 | 121.8(7) |
| C24—C25—H25   | 119.200  | C66—C65—H65 | 119.100  |
| C26—C25—H25   | 119.200  | C64—C65—H65 | 119.100  |
| C25—C26—C27   | 118.0(5) | C65—C66—C67 | 118.6(6) |
| C25—C26—C29   | 120.3(5) | C65—C66—H66 | 120.700  |
| C27—C26—C29   | 121.7(5) | C67—C66—H66 | 120.700  |
| C28—C27—C26   | 121.2(5) | C68—C67—C66 | 119.2(7) |
| C28—C27—H27   | 119.400  | C68—C67—H67 | 120.400  |

|             |          |             |          |
|-------------|----------|-------------|----------|
| C26—C27—H27 | 119.400  | C66—C67—H67 | 120.400  |
| C27—C28—C23 | 119.6(5) | C67—C68—C63 | 122.8(7) |
| C27—C28—H28 | 120.200  | C67—C68—H68 | 118.600  |
| C23—C28—H28 | 120.200  | C63—C68—H68 | 118.600  |
| C30—C29—C26 | 121.8(5) | C70—C69—C74 | 116.8(6) |
| C30—C29—C43 | 123.6(5) | C70—C69—C55 | 123.1(6) |
| C26—C29—C43 | 114.6(5) | C74—C69—C55 | 120.1(7) |
| C29—C30—C37 | 124.1(5) | C69—C70—C71 | 122.5(7) |
| C29—C30—C31 | 121.1(5) | C69—C70—H70 | 118.800  |
| C37—C30—C31 | 114.8(5) | C71—C70—H70 | 118.800  |
| C36—C31—C32 | 118.3(6) | C72—C71—C70 | 119.6(8) |
| C36—C31—C30 | 120.4(6) | C72—C71—H71 | 120.200  |
| C32—C31—C30 | 121.2(6) | C70—C71—H71 | 120.200  |
| C33—C32—C31 | 121.0(6) | C71—C72—C73 | 120.6(7) |
| C33—C32—H32 | 119.500  | C71—C72—H72 | 119.700  |
| C31—C32—H32 | 119.500  | C73—C72—H72 | 119.700  |
| C32—C33—C34 | 120.5(7) | C74—C73—C72 | 118.9(7) |
| C32—C33—H33 | 119.800  | C74—C73—H73 | 120.600  |
| C34—C33—H33 | 119.800  | C72—C73—H73 | 120.600  |
| C35—C34—C33 | 119.9(7) | C73—C74—C69 | 121.3(8) |
| C35—C34—H34 | 120.000  | C73—C74—H74 | 119.300  |
| C33—C34—H34 | 120.000  | C69—C74—H74 | 119.300  |
| C34—C35—C36 | 120.7(8) | C1—N1—C6    | 110.4(4) |
| C34—C35—H35 | 119.700  | C1—N1—C7    | 124.5(4) |
| C36—C35—H35 | 119.700  | C6—N1—C7    | 125.1(5) |
| C31—C36—C35 | 119.6(7) | C4—N2—C3    | 110.5(4) |
| C31—C36—H36 | 120.200  | C4—N2—C15   | 131.4(4) |
| C35—C36—H36 | 120.200  | C3—N2—C15   | 117.2(4) |

## Compound 8

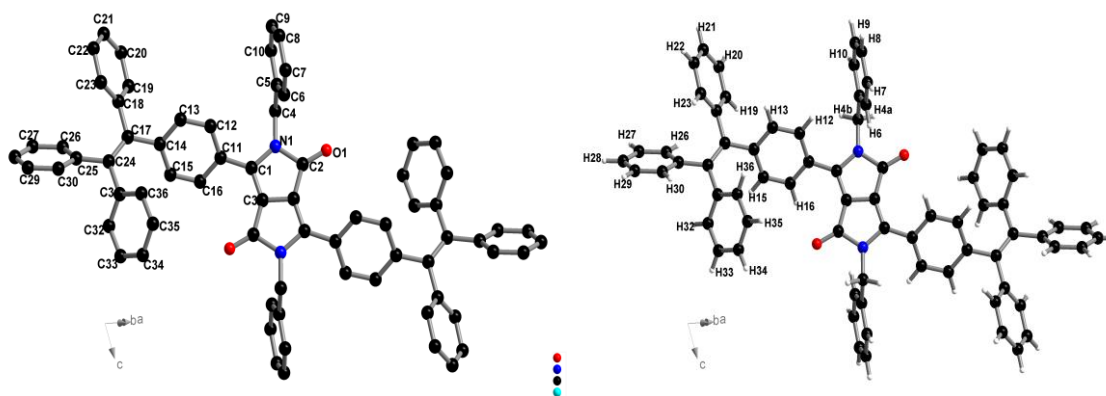

**Fig. S11** Molecular structure of compound **8** in the crystal phase, as result of single crystal X-ray diffraction experiment, with atom numbering (hydrogen omitted for clarity in the left picture, and separately numbered in the right one).

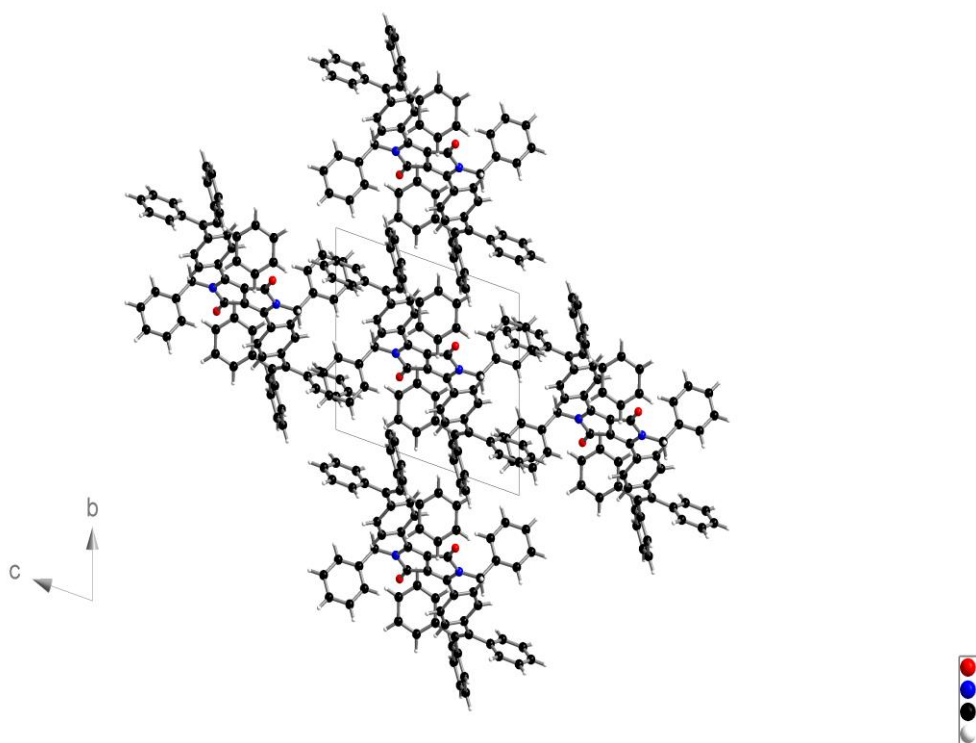

**Fig. S12** Crystal packing of compound **8** in the crystal phase, as result of single crystal X-ray diffraction experiment.

**Table S4** Bond Lengths for compound **8** in the crystal phase.

| Atoms 1,2          | d 1,2 [Å] | Atoms 1,2 | d 1,2 [Å] |
|--------------------|-----------|-----------|-----------|
| O1—C2              | 1.221(2)  | C27—C28   | 1.398(3)  |
| N1—C1              | 1.390(2)  | C30—H30   | 0.9500    |
| N1—C2              | 1.427(2)  | C30—C29   | 1.390(3)  |
| N1—C4              | 1.452(2)  | C32—H32   | 0.9500    |
| C11—C12            | 1.404(3)  | C32—C33   | 1.383(3)  |
| C11—C1             | 1.461(3)  | C4—H4a    | 0.9900    |
| C11—C16            | 1.395(3)  | C4—H4b    | 0.9900    |
| C25—C26            | 1.395(3)  | C28—H28   | 0.9500    |
| C25—C24            | 1.488(3)  | C28—C29   | 1.378(3)  |
| C25—C30            | 1.402(3)  | C29—H29   | 0.9500    |
| C15—H15            | 0.9500    | C6—H6     | 0.9500    |
| C15—C16            | 1.377(3)  | C6—C7     | 1.389(3)  |
| C15—C14            | 1.399(3)  | C19—H19   | 0.9500    |
| C3—C3 <sup>i</sup> | 1.420(4)  | C19—C20   | 1.385(3)  |
| C3—C1              | 1.377(3)  | C10—H10   | 0.9500    |
| C3—C2 <sup>i</sup> | 1.450(3)  | C10—C9    | 1.377(3)  |
| C12—H12            | 0.9500    | C36—H36   | 0.9500    |
| C12—C13            | 1.386(3)  | C36—C35   | 1.387(3)  |
| C16—H16            | 0.9500    | C35—H35   | 0.9500    |
| C5—C4              | 1.513(3)  | C35—C34   | 1.380(3)  |
| C5—C6              | 1.384(3)  | C9—H9     | 0.9500    |
| C5—C10             | 1.396(3)  | C9—C8     | 1.383(4)  |
| C17—C18            | 1.496(3)  | C23—H23   | 0.9500    |
| C17—C24            | 1.359(3)  | C23—C22   | 1.392(3)  |
| C17—C14            | 1.488(3)  | C33—H33   | 0.9500    |
| C31—C24            | 1.496(3)  | C33—C34   | 1.384(4)  |
| C31—C32            | 1.395(3)  | C7—H7     | 0.9500    |
| C31—C36            | 1.392(3)  | C7—C8     | 1.396(3)  |
| C13—H13            | 0.9500    | C34—H34   | 0.9500    |
| C13—C14            | 1.397(3)  | C8—H8     | 0.9500    |
| C18—C19            | 1.394(3)  | C20—H20   | 0.9500    |

|         |          |         |          |
|---------|----------|---------|----------|
| C18—C23 | 1.392(3) | C20—C21 | 1.384(4) |
| C26—H26 | 0.9500   | C22—H22 | 0.9500   |
| C26—C27 | 1.379(3) | C22—C21 | 1.381(4) |
| C27—H27 | 0.9500   | C21—H21 | 0.9500   |

**Table S5** Bond Angles for compound **8** in the crystal phase.

| Atoms 1,2,3 | Angle 1,2,3 [°] | Atoms 1,2,3 | Angle 1,2,3 [°] |
|-------------|-----------------|-------------|-----------------|
| C2—N1—C1    | 111.63(15)      | C33—C32—C31 | 120.7(2)        |
| C4—N1—C1    | 128.06(16)      | C33—C32—H32 | 119.65(14)      |
| C4—N1—C2    | 120.07(15)      | C5—C4—N1    | 114.07(17)      |
| C1—C11—C12  | 123.32(18)      | H4a—C4—N1   | 108.74(10)      |
| C16—C11—C12 | 118.40(17)      | H4a—C4—C5   | 108.74(10)      |
| C16—C11—C1  | 118.03(16)      | H4b—C4—N1   | 108.74(10)      |
| C24—C25—C26 | 121.55(18)      | H4b—C4—C5   | 108.74(10)      |
| C30—C25—C26 | 118.16(18)      | H4b—C4—H4a  | 107.600         |
| C30—C25—C24 | 120.16(18)      | H28—C28—C27 | 120.23(12)      |
| C16—C15—H15 | 119.33(12)      | C29—C28—C27 | 119.54(19)      |
| C14—C15—H15 | 119.33(11)      | C29—C28—H28 | 120.23(12)      |
| C14—C15—C16 | 121.35(18)      | C28—C29—C30 | 120.5(2)        |
| C2'—C3—C1   | 142.40(18)      | H29—C29—C30 | 119.77(13)      |
| H12—C12—C11 | 119.93(11)      | H29—C29—C28 | 119.77(12)      |
| C13—C12—C11 | 120.14(18)      | H6—C6—C5    | 119.49(12)      |
| C13—C12—H12 | 119.93(11)      | C7—C6—C5    | 121.0(2)        |
| C11—C1—N1   | 125.61(16)      | C7—C6—H6    | 119.49(14)      |
| C3—C1—N1    | 107.30(16)      | H19—C19—C18 | 119.45(12)      |
| C3—C1—C11   | 127.06(18)      | C20—C19—C18 | 121.1(2)        |
| C15—C16—C11 | 120.93(17)      | C20—C19—H19 | 119.45(15)      |
| H16—C16—C11 | 119.53(10)      | H10—C10—C5  | 119.73(14)      |
| H16—C16—C15 | 119.53(11)      | C9—C10—C5   | 120.5(2)        |
| C6—C5—C4    | 122.04(17)      | C9—C10—H10  | 119.73(13)      |
| C10—C5—C4   | 119.12(19)      | H36—C36—C31 | 119.50(11)      |
| C10—C5—C6   | 118.8(2)        | C35—C36—C31 | 121.0(2)        |
| C24—C17—C18 | 123.21(16)      | C35—C36—H36 | 119.50(14)      |
| C14—C17—C18 | 114.90(16)      | H35—C35—C36 | 120.11(14)      |
| C14—C17—C24 | 121.86(17)      | C34—C35—C36 | 119.8(2)        |
| C32—C31—C24 | 121.11(19)      | C34—C35—H35 | 120.11(13)      |
| C36—C31—C24 | 120.57(18)      | H9—C9—C10   | 119.75(13)      |
| C36—C31—C32 | 118.31(18)      | C8—C9—C10   | 120.5(2)        |
| H13—C13—C12 | 119.22(11)      | C8—C9—H9    | 119.75(13)      |
| C14—C13—C12 | 121.55(17)      | H23—C23—C18 | 119.78(12)      |
| C14—C13—H13 | 119.22(10)      | C22—C23—C18 | 120.4(2)        |
| C19—C18—C17 | 120.58(18)      | C22—C23—H23 | 119.78(15)      |
| C23—C18—C17 | 120.83(18)      | H33—C33—C32 | 119.95(14)      |
| C23—C18—C19 | 118.49(18)      | C34—C33—C32 | 120.1(2)        |
| H26—C26—C25 | 119.40(11)      | C34—C33—H33 | 119.95(13)      |
| C27—C26—C25 | 121.21(19)      | H7—C7—C6    | 120.30(14)      |
| C27—C26—H26 | 119.40(13)      | C8—C7—C6    | 119.4(2)        |
| C17—C24—C25 | 123.38(17)      | C8—C7—H7    | 120.30(15)      |
| C31—C24—C25 | 115.49(16)      | C33—C34—C35 | 120.0(2)        |
| C31—C24—C17 | 121.11(17)      | H34—C34—C35 | 119.98(13)      |
| N1—C2—O1    | 122.35(17)      | H34—C34—C33 | 119.98(13)      |
| C3'—C2—O1   | 134.15(17)      | C7—C8—C9    | 119.7(2)        |
| C3'—C2—N1   | 103.50(15)      | H8—C8—C9    | 120.15(13)      |
| C17—C14—C15 | 121.28(18)      | H8—C8—C7    | 120.15(15)      |
| C13—C14—C15 | 117.55(17)      | H20—C20—C19 | 120.14(15)      |
| C13—C14—C17 | 121.17(17)      | C21—C20—C19 | 119.7(2)        |
| H27—C27—C26 | 119.97(13)      | C21—C20—H20 | 120.14(14)      |
| C28—C27—C26 | 120.1(2)        | H22—C22—C23 | 119.92(15)      |
| C28—C27—H27 | 119.97(12)      | C21—C22—C23 | 120.2(2)        |
| H30—C30—C25 | 119.72(12)      | C21—C22—H22 | 119.92(14)      |
| C29—C30—C25 | 120.6(2)        | C22—C21—C20 | 120.1(2)        |
| C29—C30—H30 | 119.72(13)      | H21—C21—C20 | 119.97(14)      |
| H32—C32—C31 | 119.65(12)      | H21—C21—C22 | 119.97(14)      |

(i)  $2-x$ ,  $1-y$ ,  $1-z$ .

## DFT and TD-DFT calculations

### Compound **2RR**

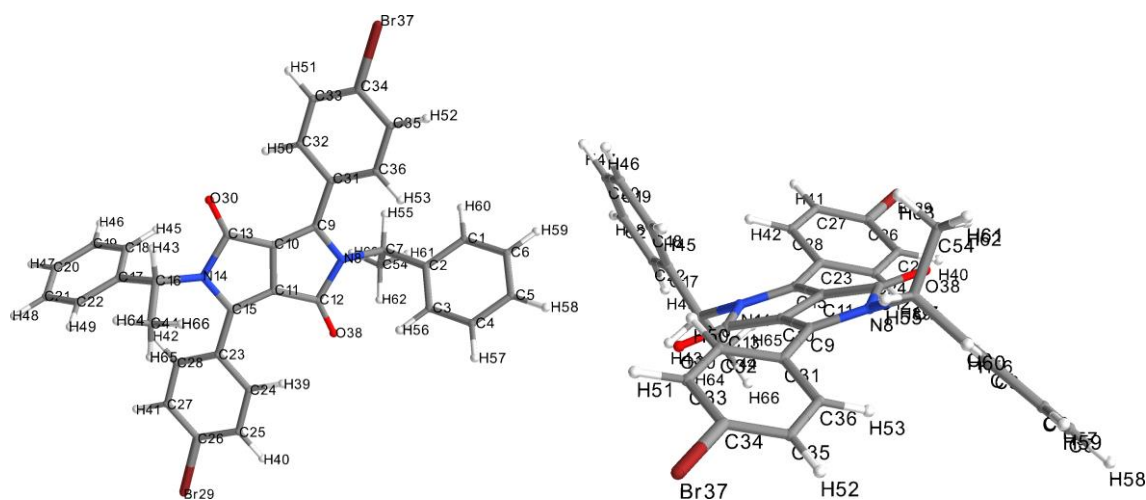

**Fig. S13** Two views of the optimized geometry of compound **2RR** with atom numbering scheme.

|                                                    |                      |
|----------------------------------------------------|----------------------|
| Total molecular energy                             | -6717.61405 hartrees |
| HOMO number                                        | 165                  |
| LUMO+1 energies                                    | -1.22 eV             |
| LUMO energies                                      | -2.76 eV             |
| HOMO energies                                      | -5.86 eV             |
| HOMO-1 energies                                    | -7.22 eV             |
| Geometry optimization specific results             |                      |
| Converged nuclear repulsion energy                 | 5377.77649 Hartrees  |
| Frequency and Thermochemistry specific results     |                      |
| Number of negative frequencies                     | 0                    |
| Sum of electronic and zero-point energy            | -6717.09833 Hartrees |
| Sum of electronic and thermal energies at 298.15 K | -6717.06360 Hartrees |
| Enthalpy at 298.15 K                               | -6717.06266 Hartrees |
| Gibbs free energy at 298.15 K                      | -6717.17088 Hartrees |
| Entropy at 298.15 K                                | 0.00036 Hartrees     |

Table. Most intense (> 20 km/mol) molecular vibrations in wavenumbers

| Frequencies | Intensity | Symmetry |
|-------------|-----------|----------|
| 1794        | 50        | A        |
| 1773        | 1027      | A        |
| 1662        | 665       | A        |
| 1651        | 71        | A        |
| 1616        | 56        | A        |
| 1532        | 283       | A        |
| 1455        | 78        | A        |
| 1448        | 148       | A        |
| 1434        | 103       | A        |
| 1422        | 67        | A        |
| 1395        | 165       | A        |
| 1373        | 117       | A        |
| 1179        | 86        | A        |
| 1133        | 50        | A        |
| 1104        | 201       | A        |
| 1078        | 51        | A        |
| 1031        | 53        | A        |
| 1030        | 64        | A        |
| 760         | 79        | A        |

Table. Results concerning the calculated mono-electronic excitations

| E.S. | Symmetry  | nm  | cm-1  | f     | R       | Lambda | dCT    | qCT  | Excitation description in %                                                                                 |
|------|-----------|-----|-------|-------|---------|--------|--------|------|-------------------------------------------------------------------------------------------------------------|
| 1    | Singlet-A | 462 | 21643 | 0.559 | 1.863   | 0.85   | 16.13  | 0.40 | 165->166 (100)                                                                                              |
| 2    | Singlet-A | 360 | 27718 | 0.000 | -2.221  | 0.33   | 125.75 | 0.77 | 158->166 (10) 159->166 (14) 160->166 (7) 161->166 (2) 162->166 (8) 163->166 (6) 164->166 (45)               |
| 3    | Singlet-A | 344 | 29002 | 0.010 | 4.386   | 0.42   | 124.94 | 0.65 | 155->166 (2) 157->166 (53) 159->166 (6) 160->166 (7) 161->166 (11) 162->166 (2) 163->166 (6)                |
| 4    | Singlet-A | 326 | 30602 | 0.037 | 19.854  | 0.36   | 88.27  | 0.68 | 154->166 (4) 160->166 (2) 161->166 (3) 163->166 (42) 164->166 (32) 165->167 (6)                             |
| 5    | Singlet-A | 317 | 31470 | 0.015 | 3.470   | 0.58   | 144.80 | 0.44 | 160->166 (2) 161->166 (7) 162->166 (18) 163->166 (14) 165->167 (52)                                         |
| 6    | Singlet-A | 314 | 31803 | 0.000 | -0.561  | 0.42   | 136.41 | 0.65 | 157->166 (9) 158->166 (5) 159->166 (8) 160->166 (8) 162->166 (15) 163->166 (22) 164->166 (12) 165->167 (13) |
| 7    | Singlet-A | 310 | 32195 | 0.261 | -80.655 | 0.43   | 148.61 | 0.62 | 154->166 (8) 156->166 (2) 157->166 (16) 159->166 (5) 160->166 (3) 161->166 (32) 162->166 (19) 163->166 (2)  |
| 8    | Singlet-A | 302 | 33038 | 0.001 | -1.588  | 0.36   | 208.77 | 0.73 | 159->166 (21) 160->166 (58) 161->166 (12) 165->167 (3)                                                      |
| 9    | Singlet-A | 300 | 33289 | 0.001 | 10.165  | 0.46   | 78.85  | 0.55 | 157->166 (3) 158->166 (5) 159->166 (15) 161->166 (14) 162->166 (31) 163->166 (2) 165->167 (18)              |
| 10   | Singlet-A | 298 | 33452 | 0.020 | 21.954  | 0.37   | 193.35 | 0.47 | 154->166 (8) 156->166 (35) 158->166 (15) 159->166 (3) 160->166 (5) 161->166 (7) 165->168 (7) 165->169 (9)   |
| 11   | Singlet-A | 297 | 33634 | 0.012 | 14.023  | 0.33   | 311.64 | 0.67 | 154->166 (9) 155->166 (3) 156->166 (7) 158->166 (51) 159->166 (16) 165->168 (4)                             |
| 12   | Singlet-A | 293 | 34071 | 0.004 | 2.023   | 0.32   | 191.67 | 0.51 | 154->166 (3) 155->166 (15) 159->166 (2) 165->168 (51) 165->169 (17)                                         |
| 13   | Singlet-A | 290 | 34437 | 0.003 | 8.219   | 0.33   | 207.34 | 0.51 | 154->166 (23) 155->166 (2) 158->166 (3) 161->166 (2) 165->168 (14) 165->169 (42)                            |
| 14   | Singlet-A | 277 | 35977 | 0.017 | 4.771   | 0.41   | 225.20 | 0.44 | 154->166 (10) 155->166 (26) 156->166 (27) 157->166 (4) 165->169 (27)                                        |
| 15   | Singlet-A | 275 | 36247 | 0.008 | -7.104  | 0.41   | 39.64  | 0.46 | 154->166 (19) 155->166 (41) 156->166 (16) 165->168 (18)                                                     |

Table. Atomic charges population analysis. Selection of the most charged atoms based on Hirshfeld analysis

| Atom and N° | Hirshfeld charge | CM5 charge | Mulliken charge |
|-------------|------------------|------------|-----------------|
| O 30        | -0.334           | -0.285     | -0.310          |
| O 38        | -0.324           | -0.271     | -0.299          |
| N 14        | -0.301           | -0.059     | +0.028          |
| N 8         | -0.297           | -0.058     | +0.082          |
| C 44        | -0.252           | -0.108     | -0.405          |
| C 54        | -0.252           | -0.110     | -0.374          |
| C 9         | +0.143           | +0.079     | +0.230          |
| C 15        | +0.146           | +0.082     | +0.096          |
| C 13        | +0.266           | +0.174     | -0.000          |
| C 12        | +0.273           | +0.180     | -0.041          |

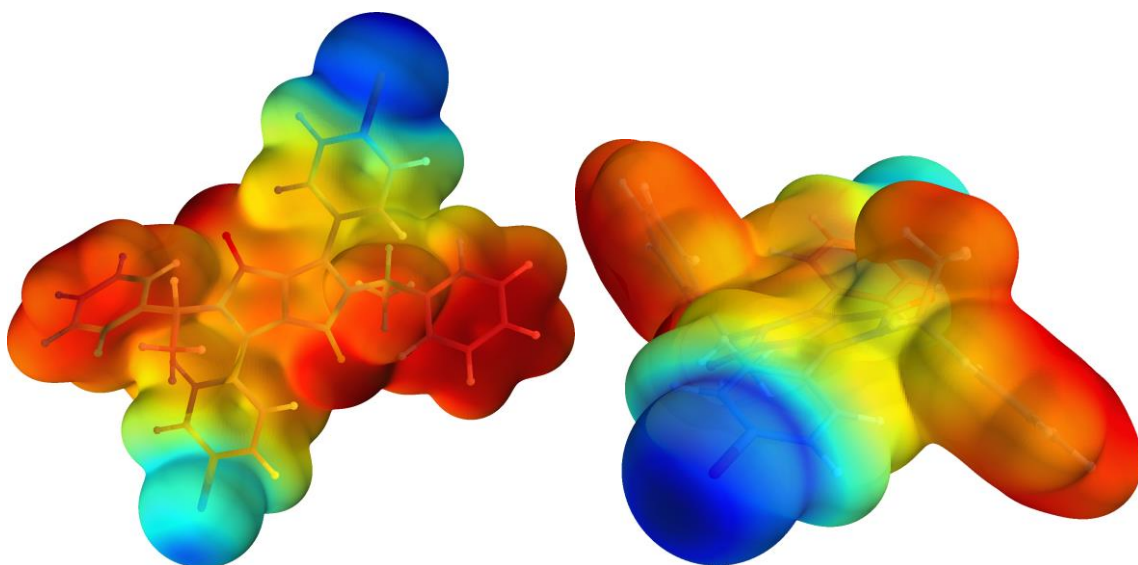

**Fig. S14** Representation of the Molecular Electrostatic Potential of **2RR** mapped on the electron density (cutoff value of 0.002 e-/bohr<sup>3</sup>). Red, blue and green regions correspond to the most negative (< -0.1 a.u.), the most positive potentials (> 0.1 a.u.) and intermediate values respectively.

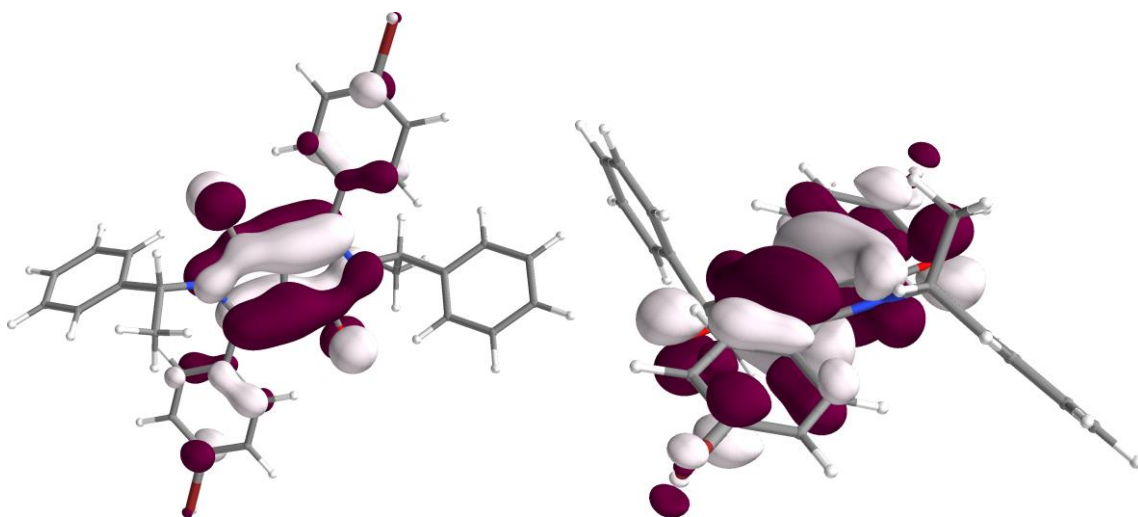

**Fig. S15** Representation of the HOMO of **2RR** from two points of view.



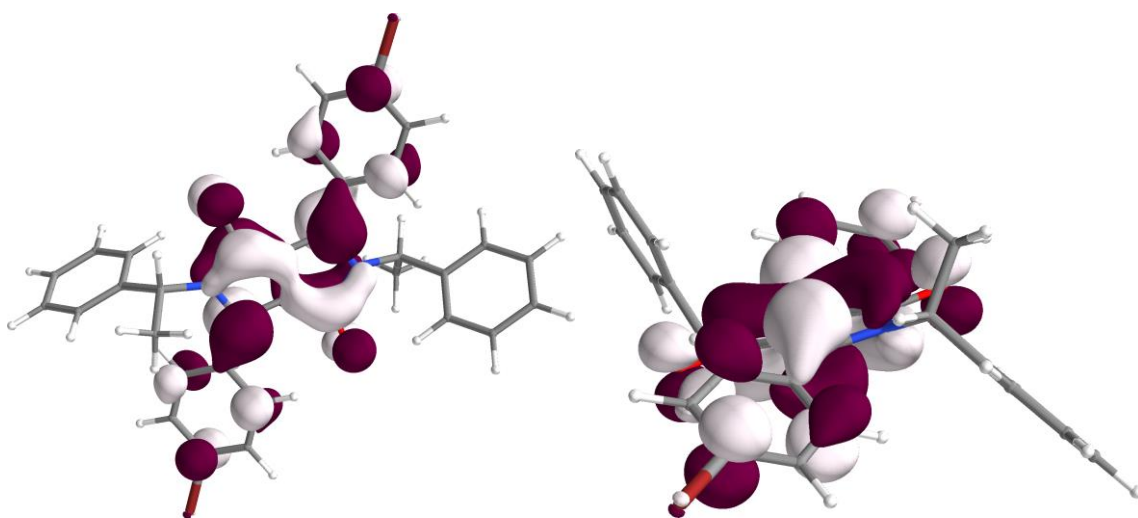

**Fig. S16** Representation of the LUMO of **2RR** from two points of view.

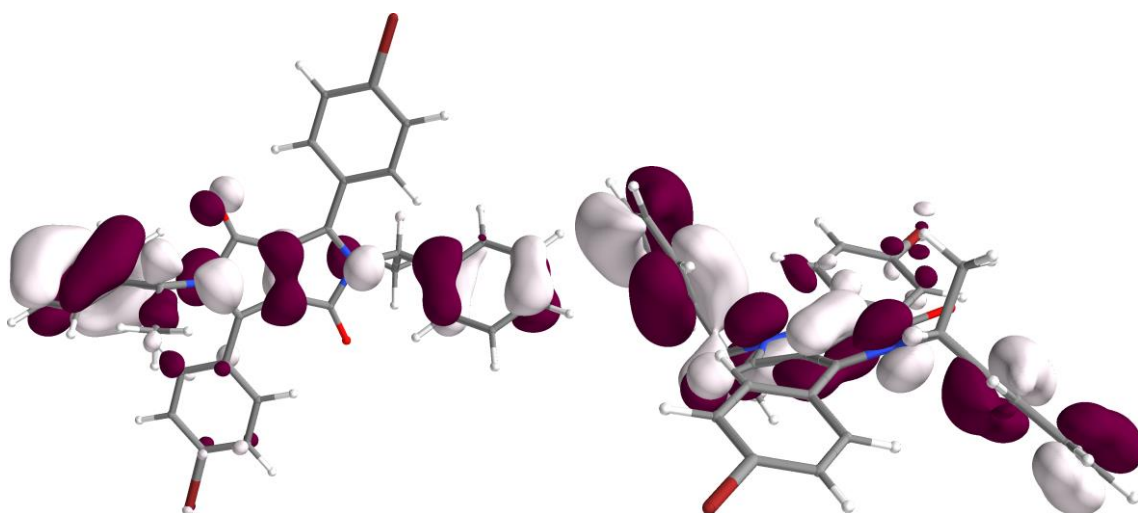

**Fig. S17** Representation of the HOMO-1 of **2RR** from two points of view.

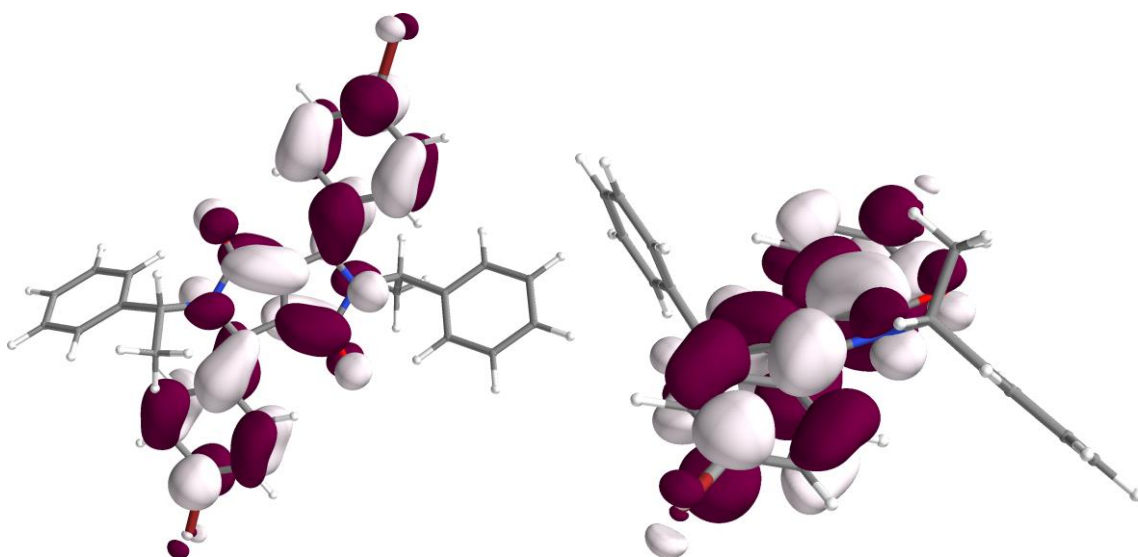

**Fig. S18** Representation of the LUMO+1 of **2RR** from two points of view.

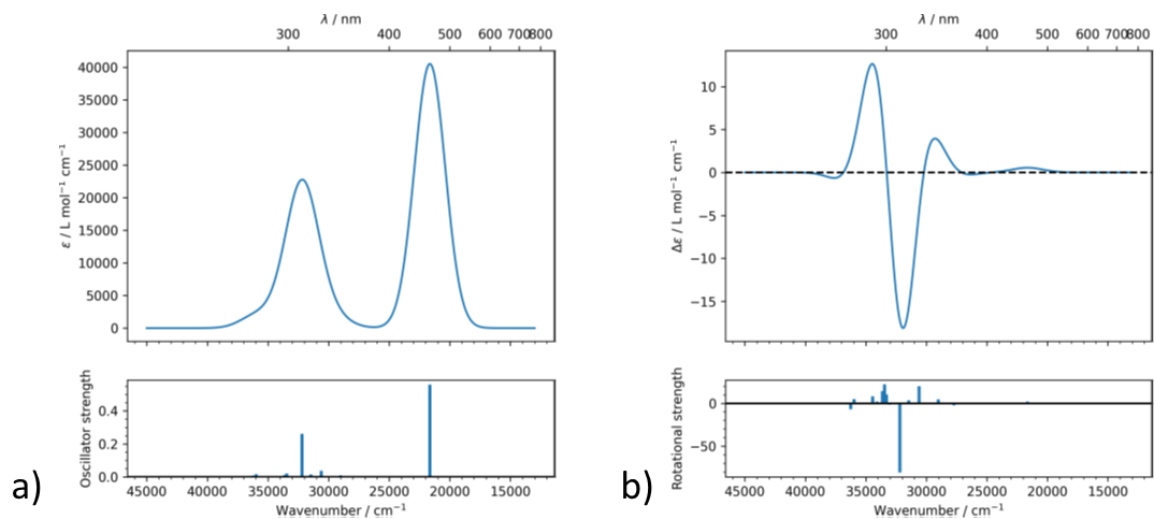

**Fig. S19** Simulated spectra for compound **2RR**, obtained with gaussian broadening (FWHM = 3000  $\text{cm}^{-1}$ ): *a*) UV-visible absorption and *b*) Circular Dichroism spectrum.

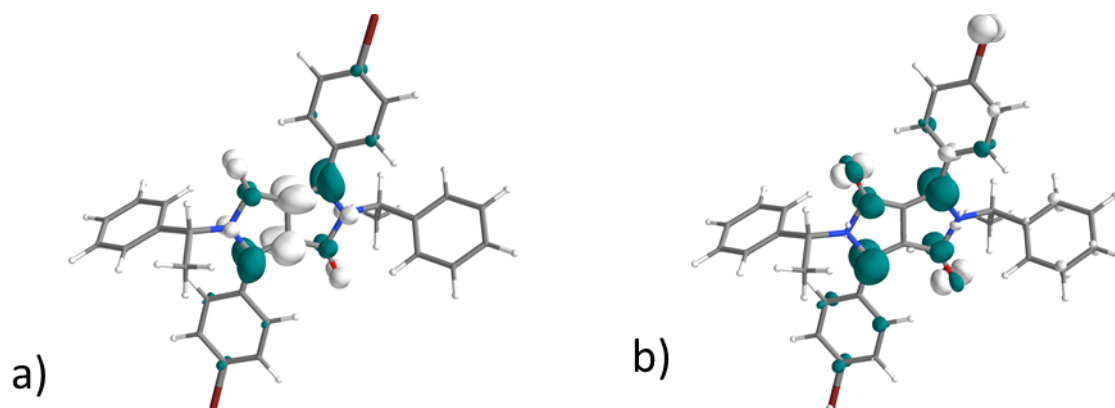

**Fig. S20** Representation of the Electron Density Difference (EDD) associated to the strongest transitions calculated for the compound **2RR**: *a*) S0-S1; *b*) S0-S7; excited electrons and holes indicated by green and white surfaces, respectively.

Table. Converged cartesian atomic coordinates in Angstroms

| Atom | X       | Y       | Z       |
|------|---------|---------|---------|
| C    | -4.2617 | -3.8055 | 0.6102  |
| C    | -2.9327 | -3.4252 | 0.4325  |
| C    | -2.1547 | -4.1230 | -0.4870 |
| C    | -2.7002 | -5.1724 | -1.2139 |
| C    | -4.0247 | -5.5441 | -1.0306 |
| C    | -4.8060 | -4.8580 | -0.1115 |
| C    | -2.3857 | -2.2982 | 1.2858  |
| N    | -1.4729 | -1.3906 | 0.5772  |
| C    | -1.7819 | -0.0812 | 0.2303  |
| C    | -0.6097 | 0.5639  | -0.0780 |
| C    | 0.4693  | -0.3472 | 0.0450  |
| C    | -0.0660 | -1.6247 | 0.4659  |
| C    | -0.0809 | 1.8312  | -0.5194 |
| N    | 1.3321  | 1.6072  | -0.6033 |
| C    | 1.6460  | 0.2945  | -0.2691 |
| C    | 2.1361  | 2.6317  | -1.2732 |
| C    | 2.9904  | 3.4470  | -0.3171 |
| C    | 2.4986  | 3.7707  | 0.9469  |
| C    | 3.2384  | 4.5550  | 1.8180  |
| C    | 4.4840  | 5.0388  | 1.4388  |
| C    | 4.9778  | 4.7323  | 0.1804  |
| C    | 4.2359  | 3.9445  | -0.6910 |
| C    | 2.9867  | -0.2799 | -0.2183 |
| C    | 3.1514  | -1.6266 | -0.5599 |
| C    | 4.3944  | -2.2300 | -0.4962 |
| C    | 5.4870  | -1.4896 | -0.0712 |
| C    | 5.3479  | -0.1604 | 0.2972  |
| C    | 4.1017  | 0.4378  | 0.2226  |
| Br   | 7.1921  | -2.3093 | 0.0203  |
| O    | -0.5969 | 2.8995  | -0.7790 |
| C    | -3.1334 | 0.4597  | 0.1576  |
| C    | -3.3454 | 1.8044  | 0.4778  |
| C    | -4.6048 | 2.3676  | 0.3786  |
| C    | -5.6648 | 1.5876  | -0.0588 |
| C    | -5.4778 | 0.2588  | -0.4085 |
| C    | -4.2160 | -0.2998 | -0.2986 |
| Br   | -7.3916 | 2.3528  | -0.1968 |
| O    | 0.4573  | -2.7022 | 0.6704  |
| H    | 2.2946  | -2.2124 | -0.8663 |
| H    | 4.5107  | -3.2711 | -0.7691 |
| H    | 6.2030  | 0.4038  | 0.6477  |
| H    | 3.9997  | 1.4700  | 0.5294  |
| H    | 1.3609  | 3.3217  | -1.6268 |
| C    | 2.8520  | 2.0908  | -2.5032 |
| H    | 1.5257  | 3.4012  | 1.2505  |
| H    | 2.8384  | 4.7925  | 2.7977  |
| H    | 5.0634  | 5.6516  | 2.1201  |
| H    | 5.9479  | 5.1055  | -0.1293 |
| H    | 4.6456  | 3.7108  | -1.6661 |
| H    | -2.5120 | 2.4194  | 0.7928  |
| H    | -4.7595 | 3.4083  | 0.6335  |
| H    | -6.3078 | -0.3337 | -0.7725 |
| H    | -4.0728 | -1.3306 | -0.6001 |
| C    | -1.7810 | -2.8172 | 2.5907  |
| H    | -3.2353 | -1.6706 | 1.5623  |
| H    | -1.1130 | -3.8572 | -0.6173 |
| H    | -2.0815 | -5.7065 | -1.9268 |
| H    | -4.4462 | -6.3644 | -1.6008 |
| H    | -5.8428 | -5.1377 | 0.0403  |
| H    | -4.8819 | -3.2670 | 1.3218  |
| H    | -2.5541 | -3.3561 | 3.1416  |
| H    | -0.9474 | -3.4909 | 2.4052  |
| H    | -1.4336 | -1.9852 | 3.2081  |
| H    | 3.1973  | 2.9170  | -3.1267 |
| H    | 3.7100  | 1.4655  | -2.2544 |
| H    | 2.1548  | 1.4997  | -3.0994 |

## Compound 2SS

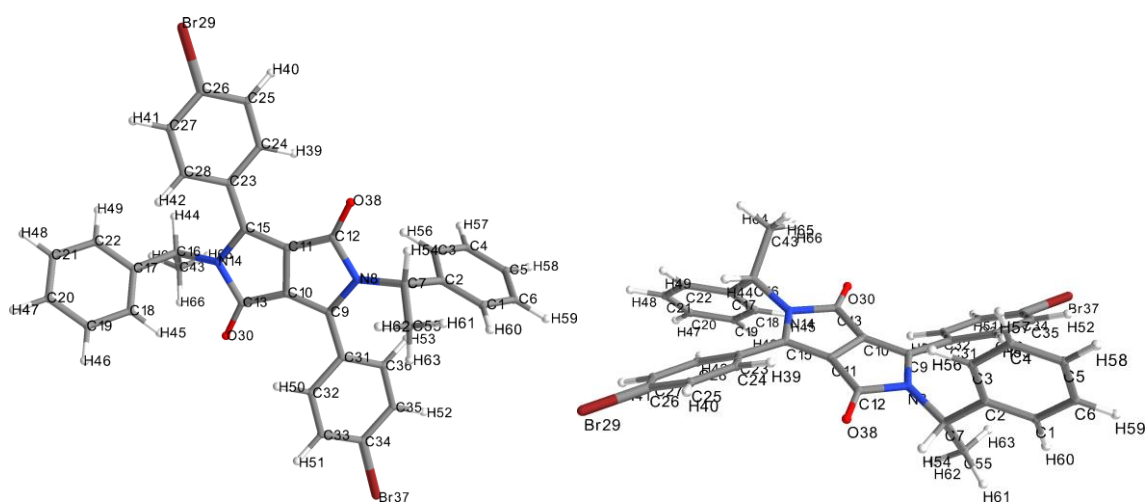

**Fig. S21** Two views of the optimized geometry of compound **2SS** with atom numbering scheme.

|                                                    |                      |
|----------------------------------------------------|----------------------|
| Total molecular energy                             | -6717.61405 hartrees |
| HOMO number                                        | 165                  |
| LUMO+1 energies                                    | -1.22 eV             |
| LUMO energies                                      | -2.76 eV             |
| HOMO energies                                      | -5.86 eV             |
| HOMO-1 energies                                    | -7.22 eV             |
| Geometry optimization specific results             |                      |
| Converged nuclear repulsion energy                 | 5377.77692 Hartrees  |
| Frequency and Thermochemistry specific results     |                      |
| Number of negative frequencies                     | 0                    |
| Sum of electronic and zero-point energy            | -6717.09833 Hartrees |
| Sum of electronic and thermal energies at 298.15 K | -6717.06360 Hartrees |
| Enthalpy at 298.15 K                               | -6717.06266 Hartrees |
| Gibbs free energy at 298.15 K                      | -6717.17088 Hartrees |
| Entropy at 298.15 K                                | 0.00036 Hartrees     |

Table. Most intense (> 20 km/mol) molecular vibrations in wavenumbers

| Frequencies | Intensity | Symmetry |
|-------------|-----------|----------|
| 1794        | 50        | A        |
| 1773        | 1027      | A        |
| 1662        | 665       | A        |
| 1651        | 71        | A        |
| 1616        | 56        | A        |
| 1532        | 283       | A        |
| 1455        | 78        | A        |
| 1448        | 148       | A        |
| 1434        | 103       | A        |
| 1422        | 67        | A        |
| 1395        | 165       | A        |
| 1373        | 117       | A        |
| 1179        | 86        | A        |
| 1133        | 50        | A        |
| 1104        | 202       | A        |
| 1078        | 51        | A        |
| 1031        | 53        | A        |
| 1030        | 64        | A        |
| 760         | 80        | A        |

Table. Results concerning the calculated mono-electronic excitations

| E.S. | Symmetry  | nm  | cm-1  | f     | R       | Lambda | dCT    | qCT  | Excitation description in %                                                                                 |
|------|-----------|-----|-------|-------|---------|--------|--------|------|-------------------------------------------------------------------------------------------------------------|
| 1    | Singlet-A | 462 | 21643 | 0.559 | -1.863  | 0.85   | 16.13  | 0.40 | 165->166 (100)                                                                                              |
| 2    | Singlet-A | 360 | 27718 | 0.000 | 2.221   | 0.33   | 125.75 | 0.77 | 158->166 (10) 159->166 (14) 160->166 (7) 161->166 (2) 162->166 (8) 163->166 (6) 164->166 (45)               |
| 3    | Singlet-A | 344 | 29002 | 0.010 | -4.386  | 0.42   | 124.94 | 0.65 | 155->166 (2) 157->166 (53) 159->166 (6) 160->166 (7) 161->166 (11) 162->166 (2) 163->166 (6)                |
| 4    | Singlet-A | 326 | 30602 | 0.037 | -19.854 | 0.36   | 88.27  | 0.68 | 154->166 (4) 160->166 (2) 161->166 (3) 163->166 (42) 164->166 (32) 165->167 (6)                             |
| 5    | Singlet-A | 317 | 31470 | 0.015 | -3.470  | 0.58   | 144.80 | 0.44 | 160->166 (2) 161->166 (7) 162->166 (18) 163->166 (14) 165->167 (52)                                         |
| 6    | Singlet-A | 314 | 31803 | 0.000 | 0.561   | 0.42   | 136.41 | 0.65 | 157->166 (9) 158->166 (5) 159->166 (8) 160->166 (8) 162->166 (15) 163->166 (22) 164->166 (12) 165->167 (13) |
| 7    | Singlet-A | 310 | 32195 | 0.261 | 80.655  | 0.43   | 148.61 | 0.62 | 154->166 (8) 156->166 (2) 157->166 (16) 159->166 (5) 160->166 (3) 161->166 (32) 162->166 (19) 163->166 (2)  |
| 8    | Singlet-A | 302 | 33038 | 0.001 | 1.588   | 0.36   | 208.77 | 0.73 | 159->166 (21) 160->166 (58) 161->166 (12) 165->167 (3)                                                      |
| 9    | Singlet-A | 300 | 33289 | 0.001 | -10.165 | 0.46   | 78.85  | 0.55 | 157->166 (3) 158->166 (5) 159->166 (15) 161->166 (14) 162->166 (31) 163->166 (2) 165->167 (18)              |
| 10   | Singlet-A | 298 | 33452 | 0.020 | -21.954 | 0.37   | 193.35 | 0.47 | 154->166 (8) 156->166 (35) 158->166 (15) 159->166 (3) 160->166 (5) 161->166 (7) 165->168 (7) 165->169 (9)   |
| 11   | Singlet-A | 297 | 33634 | 0.012 | -14.023 | 0.33   | 311.64 | 0.67 | 154->166 (9) 155->166 (3) 156->166 (7) 158->166 (51) 159->166 (16) 165->168 (4)                             |
| 12   | Singlet-A | 293 | 34071 | 0.004 | -2.023  | 0.32   | 191.66 | 0.51 | 154->166 (3) 155->166 (15) 159->166 (2) 165->168 (51) 165->169 (17)                                         |
| 13   | Singlet-A | 290 | 34437 | 0.003 | -8.219  | 0.33   | 207.33 | 0.51 | 154->166 (23) 155->166 (2) 158->166 (3) 161->166 (2) 165->168 (14) 165->169 (42)                            |
| 14   | Singlet-A | 277 | 35977 | 0.017 | -4.771  | 0.41   | 225.21 | 0.44 | 154->166 (10) 155->166 (26) 156->166 (27) 157->166 (4) 165->169 (27)                                        |
| 15   | Singlet-A | 275 | 36247 | 0.008 | 7.104   | 0.41   | 39.64  | 0.46 | 154->166 (19) 155->166 (41) 156->166 (16) 165->168 (18)                                                     |

Table. Atomic charges population analysis. Selection of the most charged atoms based on Hirshfeld analysis

| Atom and N° | Hirshfeld charge | CM5 charge | Mulliken charge |
|-------------|------------------|------------|-----------------|
| O 38        | -0.334           | -0.285     | -0.310          |
| O 30        | -0.324           | -0.271     | -0.299          |
| N 8         | -0.301           | -0.059     | +0.028          |
| N 14        | -0.297           | -0.058     | +0.082          |
| C 55        | -0.252           | -0.108     | -0.405          |
| C 43        | -0.252           | -0.110     | -0.374          |
| C 15        | +0.143           | +0.079     | +0.230          |
| C 9         | +0.146           | +0.082     | +0.096          |
| C 12        | +0.266           | +0.174     | -0.000          |
| C 13        | +0.273           | +0.180     | -0.041          |

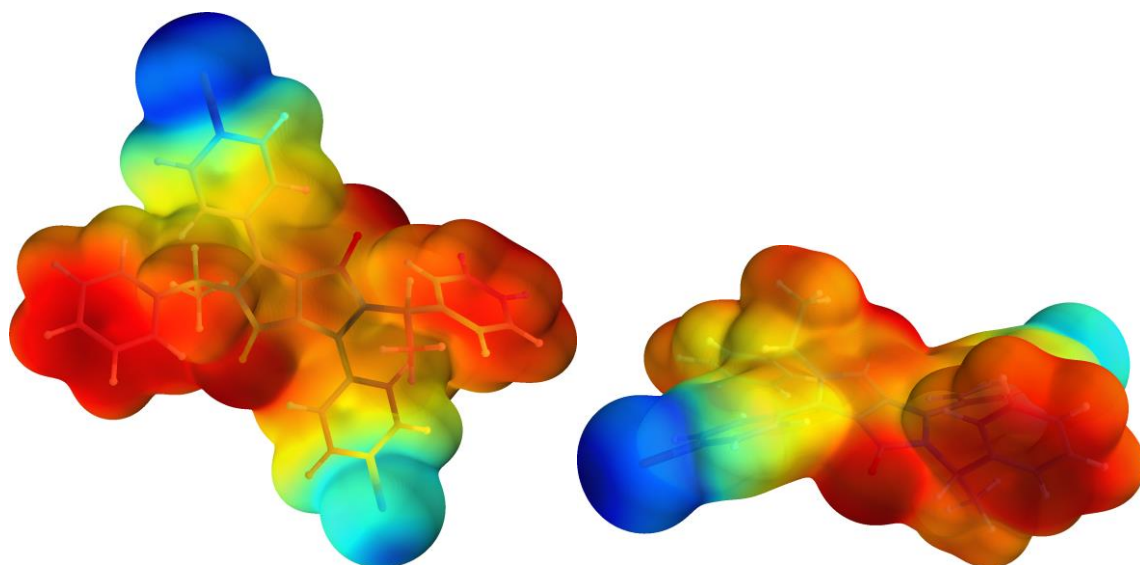

**Fig. S22** Representation of the Molecular Electrostatic Potential of **2SS** mapped on the electron density (cutoff value of 0.002 e-/bohr<sup>3</sup>). Red, blue and green regions correspond to the most negative (< -0.1 a.u.), the most positive potentials (> 0.1 a.u.) and intermediate values respectively.

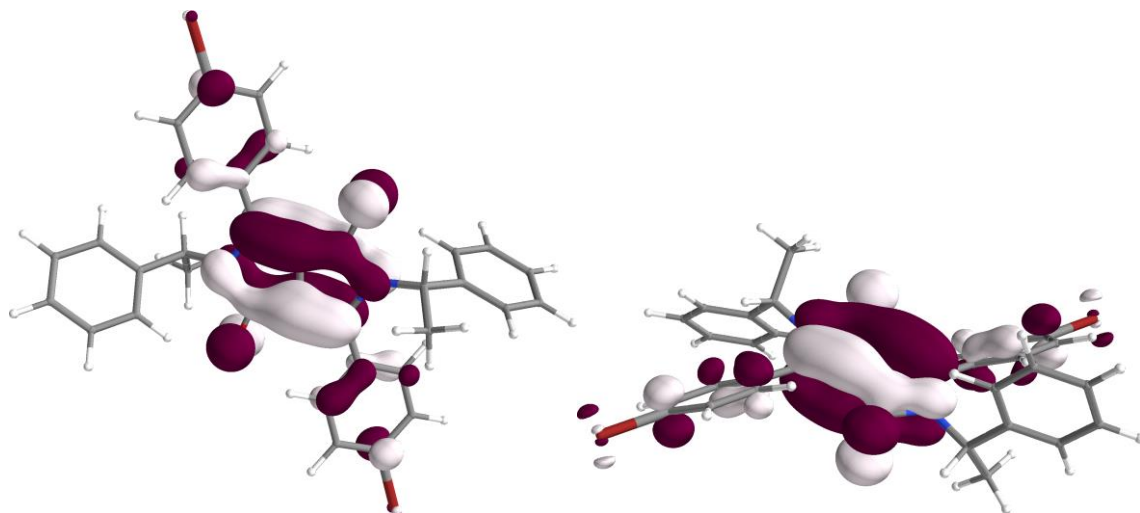

**Fig. S23** Representation of the HOMO of **2SS** from two points of view.

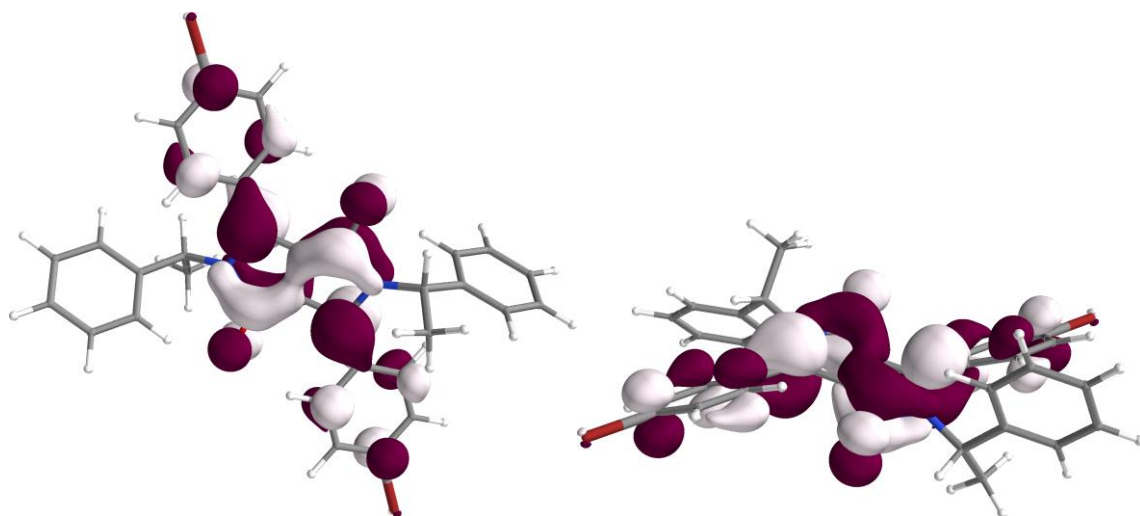

**Fig. S24** Representation of the LUMO of **2SS** from two points of view.

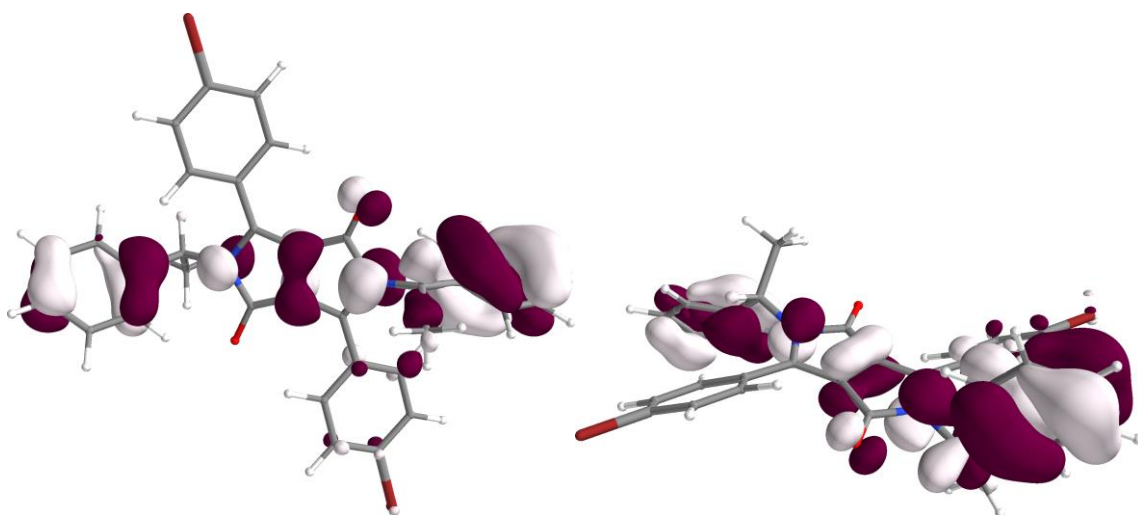

**Fig. S25** Representation of the HOMO-1 of **2SS** from two points of view.

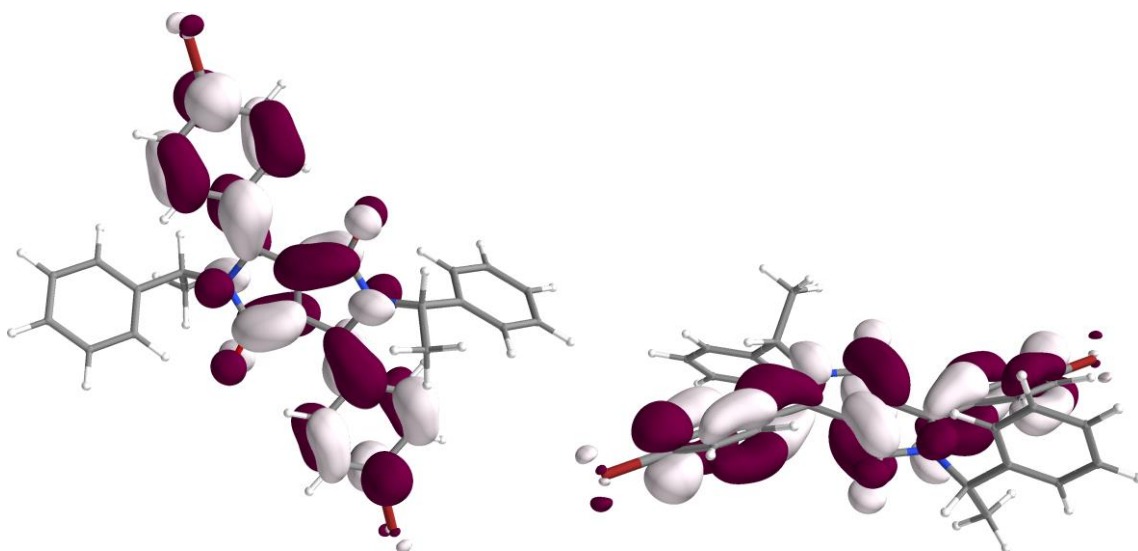

**Fig. S26** Representation of the LUMO+1 of **2SS** from two points of view.

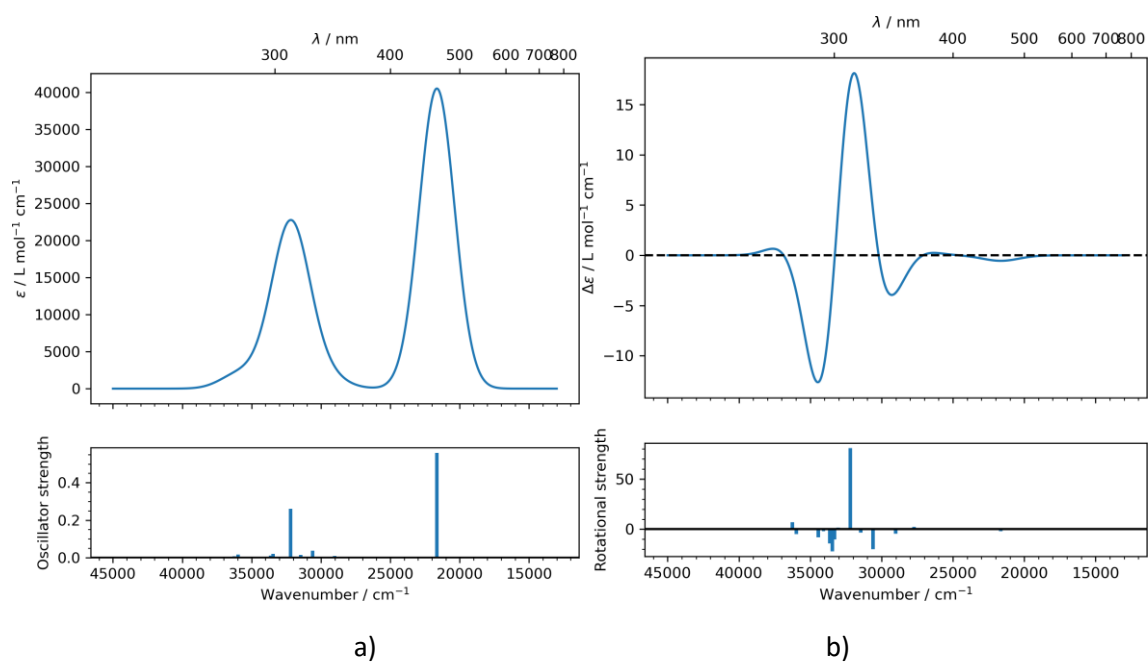

**Fig. S27** Simulated spectra for compound **25S**, obtained with gaussian broadening (FWHM = 3000  $\text{cm}^{-1}$ ): *a*) UV-visible absorption and *b*) Circular Dichroism spectrum.

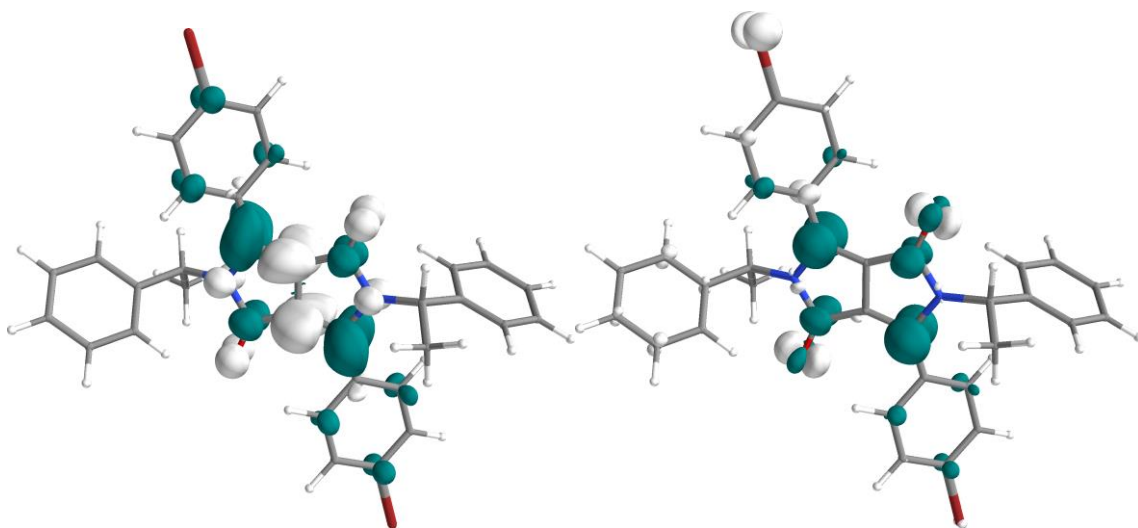

**Fig. S28** Representation of the Electron Density Difference (EDD) associated to the strongest transitions calculated for the compound **25S**: *a*) S0-S1; *b*) S0-S7; excited electrons and holes indicated by green and white surfaces, respectively.



## Compound **3RR**

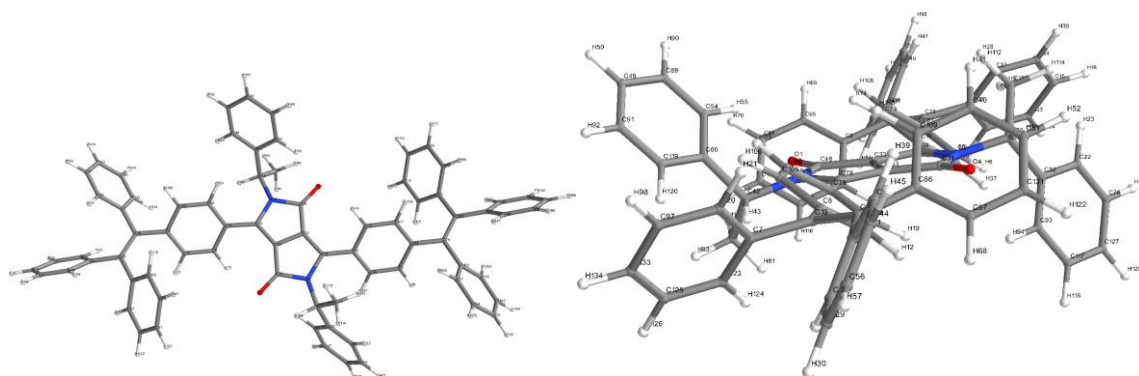

**Fig. S29** Two views of the optimized geometry of compound **3RR** with atom numbering scheme.

|                                        |                      |
|----------------------------------------|----------------------|
| Total molecular energy                 | -3110.83781 hartrees |
| HOMO number                            | 265                  |
| LUMO+1 energies                        | -1.54 eV             |
| LUMO energies                          | -2.48 eV             |
| HOMO energies                          | -5.43 eV             |
| HOMO-1 energies                        | -5.92 eV             |
| Geometry optimization specific results |                      |
| Converged nuclear repulsion energy     | 11489.65179 Hartrees |

Table. First five calculated mono-electronic excitations and those with  $f > 0.1$  or  $R > 10$ .

| E.S. | Symmetry  | nm  | $\text{cm}^{-1}$ | $f$   | R     | $\Lambda$ | $d_{CT}$ | $q_{CT}$ | Excitation description : initial OM - ending OM (% if $> 5\%$ )                        |
|------|-----------|-----|------------------|-------|-------|-----------|----------|----------|----------------------------------------------------------------------------------------|
| 1    | Singlet-A | 501 | 19921            | 0.859 | -16.3 | 0.81      | 59.78    | 0.42     | 265-266(98);                                                                           |
| 2    | Singlet-A | 419 | 23811            | 0.001 | 16.5  | 0.44      | 192.27   | 0.79     | 264-266(97);                                                                           |
| 3    | Singlet-A | 402 | 24849            | 0.142 | -11.6 | 0.61      | 219.90   | 0.63     | 263-266(96);                                                                           |
| 4    | Singlet-A | 370 | 27013            | 0.001 | 14.4  | 0.61      | 154.13   | 0.59     | 265-267(89);                                                                           |
| 5    | Singlet-A | 358 | 27897            | 0.000 | -2.0  | 0.38      | 187.47   | 0.71     | 255-266(11); 261-266(10); 262-266(53); 265-267(6);                                     |
| 6    | Singlet-A | 345 | 28923            | 0.163 | -4.3  | 0.48      | 172.76   | 0.40     | 251-266(8); 252-266(6); 256-266(17); 265-268(43);                                      |
| 7    | Singlet-A | 343 | 29135            | 0.207 | -8.4  | 0.49      | 137.60   | 0.41     | 251-266(7); 252-266(6); 256-266(14); 265-268(44);                                      |
| 8    | Singlet-A | 321 | 31138            | 0.215 | 6.6   | 0.73      | 342.43   | 0.35     | 263-268(13); 264-267(70); 265-268(7);                                                  |
| 9    | Singlet-A | 319 | 31321            | 0.014 | -42.1 | 0.34      | 316.73   | 0.64     | 242-266(8); 255-266(10); 259-266(11); 261-266(18); 262-266(19);                        |
| 10   | Singlet-A | 317 | 31484            | 0.002 | 49.0  | 0.73      | 67.17    | 0.36     | 263-267(56); 264-268(32);                                                              |
| 15   | Singlet-A | 301 | 33159            | 0.061 | -18.6 | 0.33      | 155.72   | 0.48     | 245-266(8); 256-266(17); 257-266(8); 258-266(8); 260-266(10); 265-270(6); 265-271(10); |
| 21   | Singlet-A | 294 | 33915            | 0.022 | -42.8 | 0.42      | 297.80   | 0.34     | 251-266(9); 256-266(8); 263-267(7); 264-268(14); 265-271(22);                          |
| 22   | Singlet-A | 293 | 34031            | 0.016 | 29.0  | 0.57      | 207.35   | 0.29     | 256-266(6); 263-267(15); 264-268(36); 265-271(14);                                     |
| 23   | Singlet-A | 291 | 34355            | 0.008 | 12.9  | 0.30      | 107.51   | 0.53     | 242-266(9); 251-266(8); 252-266(10); 253-266(29); 254-266(8); 265-270(10);             |
| 24   | Singlet-A | 289 | 34564            | 0.063 | -13.7 | 0.61      | 210.96   | 0.33     | 251-266(6); 263-268(46); 264-267(6); 264-269(7); 265-272(9);                           |
| 27   | Singlet-A | 281 | 35573            | 0.174 | -4.2  | 0.32      | 169.50   | 0.46     | 245-266(6); 249-266(10); 250-266(9); 252-266(27); 265-272(9);                          |
| 28   | Singlet-A | 279 | 35727            | 0.033 | 17.1  | 0.29      | 89.50    | 0.63     | 249-266(15); 250-266(46);                                                              |
| 30   | Singlet-A | 276 | 36151            | 0.020 | 32.1  | 0.36      | 218.21   | 0.31     | 247-266(13); 248-266(17); 264-272(7); 265-273(22);                                     |
| 31   | Singlet-A | 275 | 36331            | 0.272 | 21.3  | 0.36      | 77.88    | 0.47     | 244-266(8); 245-266(10); 247-266(22); 248-266(25); 265-272(9);                         |
| 32   | Singlet-A | 274 | 36392            | 0.049 | -18.6 | 0.37      | 623.86   | 0.41     | 245-266(15); 263-270(22); 264-270(16);                                                 |
| 33   | Singlet-A | 273 | 36518            | 0.005 | 10.2  | 0.34      | 207.00   | 0.39     | 246-266(8); 247-266(14); 248-266(6); 249-266(15); 250-266(6); 265-273(19);             |
| 34   | Singlet-A | 273 | 36617            | 0.005 | -16.1 | 0.35      | 71.95    | 0.36     | 245-266(13); 248-266(10); 249-266(18); 265-273(17);                                    |
| 49   | Singlet-A | 258 | 38741            | 0.007 | -45.1 | 0.30      | 531.36   | 0.43     | 259-267(9); 261-267(19); 261-268(13); 262-267(7);                                      |
| 50   | Singlet-A | 257 | 38861            | 0.024 | 55.2  | 0.35      | 15.56    | 0.44     | 260-267(39); 260-268(15); 261-267(8);                                                  |

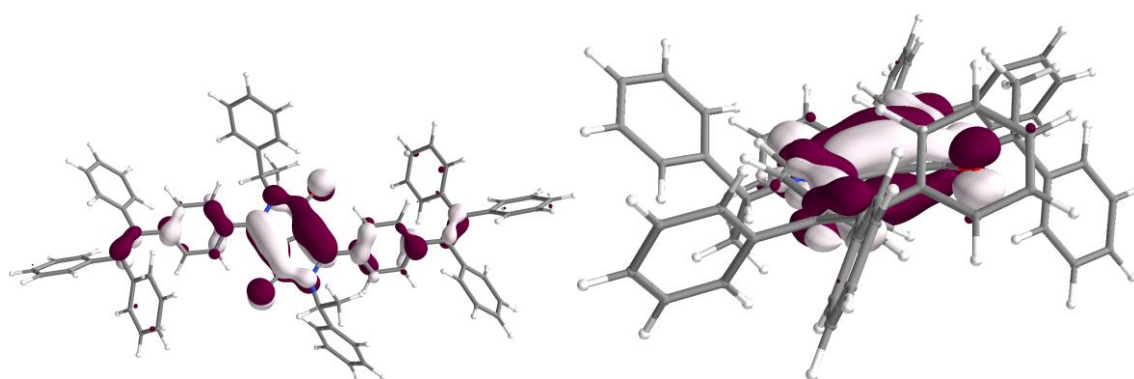

Fig. S30 Representation of the HOMO of **3RR** from two points of view.

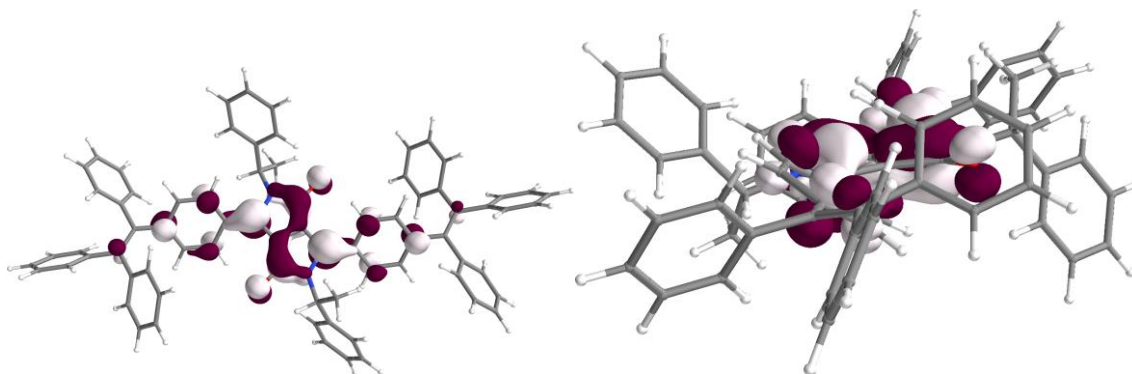

**Fig. S31** Representation of the LUMO of **3RR** from two points of view.

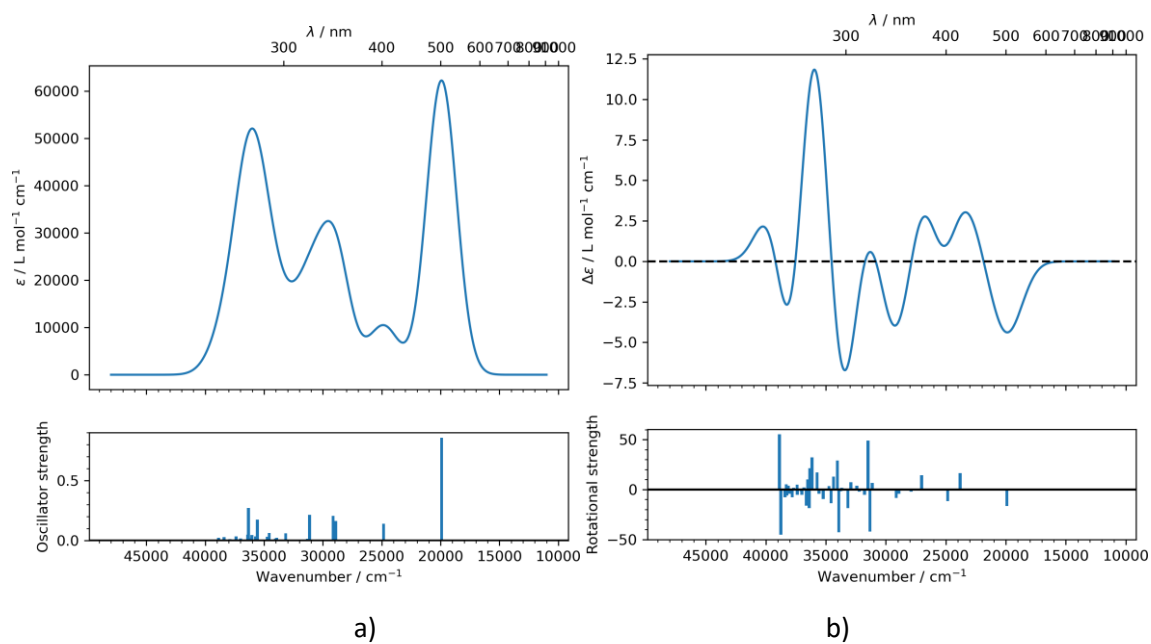

**Fig. S32** Simulated spectra for compound **3RR**, obtained with gaussian broadening (FWHM = 3000  $\text{cm}^{-1}$ ): *a*) UV-visible absorption and *b*) Circular Dichroism spectrum.

## Compound 3SS

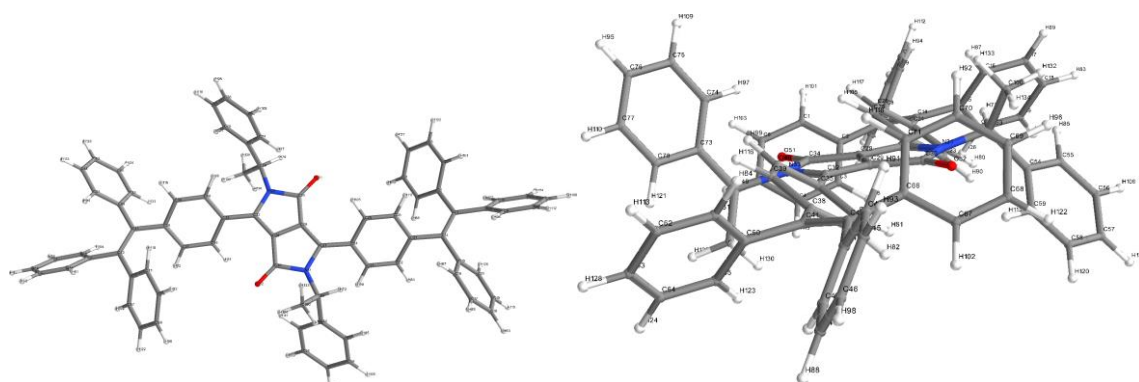

**Fig. S33** Two views of the optimized geometry of compound **3SS** with atom numbering scheme.

|                                        |                      |
|----------------------------------------|----------------------|
| Total molecular energy                 | -3110.83781 hartrees |
| HOMO number                            | 265                  |
| LUMO+1 energies                        | -1.54 eV             |
| LUMO energies                          | -2.48 eV             |
| HOMO energies                          | -5.43 eV             |
| HOMO-1 energies                        | -5.92 eV             |
| Geometry optimization specific results |                      |
| Converged nuclear repulsion energy     | 11489.62360 Hartrees |
| Enthalpy at 298.15 K                   | -3109.68262 Hartrees |
| Gibbs free energy at 298.15 K          | -3109.85930 Hartrees |
| Entropy at 298.15 K                    | 0.00059 Hartrees     |

Table. First five calculated mono-electronic excitations and those with  $f > 0.1$  or  $R > 10$ .

| E.S. | Symmetry  | nm  | cm <sup>-1</sup> | $f$   | R     | $\Lambda$ | $d_{CT}$ | $q_{CT}$ | Excitation description : initial OM - ending OM (% if > 5%)                            |
|------|-----------|-----|------------------|-------|-------|-----------|----------|----------|----------------------------------------------------------------------------------------|
| 1    | Singlet-A | 502 | 19918            | 0.859 | 16.2  | 0.81      | 59.75    | 0.42     | 265-266(98);                                                                           |
| 2    | Singlet-A | 420 | 23809            | 0.001 | -16.5 | 0.44      | 192.36   | 0.79     | 264-266(97);                                                                           |
| 3    | Singlet-A | 402 | 24848            | 0.142 | 11.6  | 0.61      | 219.95   | 0.63     | 263-266(96);                                                                           |
| 4    | Singlet-A | 370 | 27013            | 0.001 | -14.3 | 0.61      | 153.86   | 0.59     | 265-267(89);                                                                           |
| 5    | Singlet-A | 358 | 27896            | 0.000 | 2.0   | 0.38      | 187.29   | 0.71     | 255-266(11); 261-266(10); 262-266(53); 265-267(6);                                     |
| 6    | Singlet-A | 345 | 28923            | 0.162 | 4.2   | 0.48      | 174.44   | 0.40     | 251-266(8); 252-266(6); 256-266(17); 265-268(43);                                      |
| 7    | Singlet-A | 343 | 29133            | 0.209 | 8.5   | 0.49      | 136.03   | 0.40     | 251-266(7); 252-266(6); 256-266(14); 265-268(45);                                      |
| 8    | Singlet-A | 321 | 31138            | 0.215 | -6.8  | 0.73      | 342.45   | 0.35     | 263-268(13); 264-267(70); 265-268(7);                                                  |
| 9    | Singlet-A | 319 | 31320            | 0.014 | 42.1  | 0.34      | 316.59   | 0.64     | 242-266(8); 255-266(10); 259-266(11); 261-266(18); 262-266(19);                        |
| 10   | Singlet-A | 317 | 31484            | 0.002 | -48.8 | 0.73      | 67.34    | 0.36     | 263-267(56); 264-268(32);                                                              |
| 15   | Singlet-A | 301 | 33158            | 0.061 | 18.6  | 0.33      | 153.18   | 0.48     | 245-266(8); 256-266(17); 257-266(8); 258-266(8); 260-266(10); 265-270(6); 265-271(10); |
| 21   | Singlet-A | 294 | 33914            | 0.022 | 42.7  | 0.42      | 302.26   | 0.34     | 251-266(9); 256-266(8); 263-267(7); 264-268(14); 265-271(22);                          |
| 22   | Singlet-A | 293 | 34031            | 0.016 | -29.0 | 0.57      | 207.15   | 0.29     | 256-266(6); 263-267(15); 264-268(36); 265-271(14);                                     |
| 23   | Singlet-A | 291 | 34353            | 0.008 | -13.0 | 0.30      | 107.80   | 0.53     | 242-266(9); 251-266(8); 252-266(10); 253-266(29); 254-266(8); 265-270(10);             |
| 24   | Singlet-A | 289 | 34564            | 0.063 | 13.8  | 0.61      | 210.20   | 0.33     | 251-266(6); 263-268(46); 264-267(6); 264-269(7); 265-272(9);                           |
| 27   | Singlet-A | 281 | 35571            | 0.174 | 4.2   | 0.32      | 169.75   | 0.46     | 245-266(6); 249-266(10); 250-266(9); 252-266(27); 265-272(9);                          |
| 28   | Singlet-A | 279 | 35725            | 0.033 | -17.1 | 0.29      | 89.67    | 0.63     | 249-266(15); 250-266(46);                                                              |
| 30   | Singlet-A | 276 | 36150            | 0.020 | -31.8 | 0.36      | 217.40   | 0.31     | 247-266(13); 248-266(17); 264-272(7); 265-273(22);                                     |
| 31   | Singlet-A | 275 | 36329            | 0.272 | -21.6 | 0.36      | 75.11    | 0.47     | 244-266(8); 245-266(10); 247-266(23); 248-266(24); 265-272(9);                         |
| 32   | Singlet-A | 274 | 36392            | 0.050 | 18.7  | 0.37      | 625.04   | 0.41     | 245-266(15); 263-270(22); 264-270(16);                                                 |
| 33   | Singlet-A | 273 | 36517            | 0.005 | -10.3 | 0.34      | 205.96   | 0.39     | 246-266(8); 247-266(14); 248-266(6); 249-266(15); 250-266(6); 265-273(19);             |
| 34   | Singlet-A | 273 | 36615            | 0.005 | 16.1  | 0.35      | 71.67    | 0.35     | 245-266(13); 248-266(10); 249-266(18); 265-273(17);                                    |
| 49   | Singlet-A | 258 | 38741            | 0.007 | 45.2  | 0.29      | 560.73   | 0.43     | 259-267(9); 261-267(19); 261-268(13); 262-267(7);                                      |
| 50   | Singlet-A | 257 | 38861            | 0.024 | -55.2 | 0.35      | 815.83   | 0.44     | 260-267(39); 260-268(15); 261-267(8);                                                  |

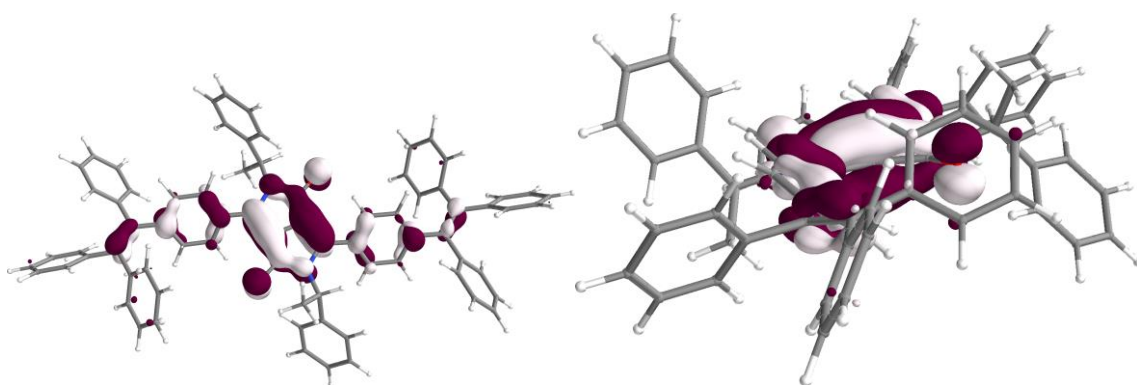

Fig. S34 Representation of the HOMO of 3SS from two points of view.

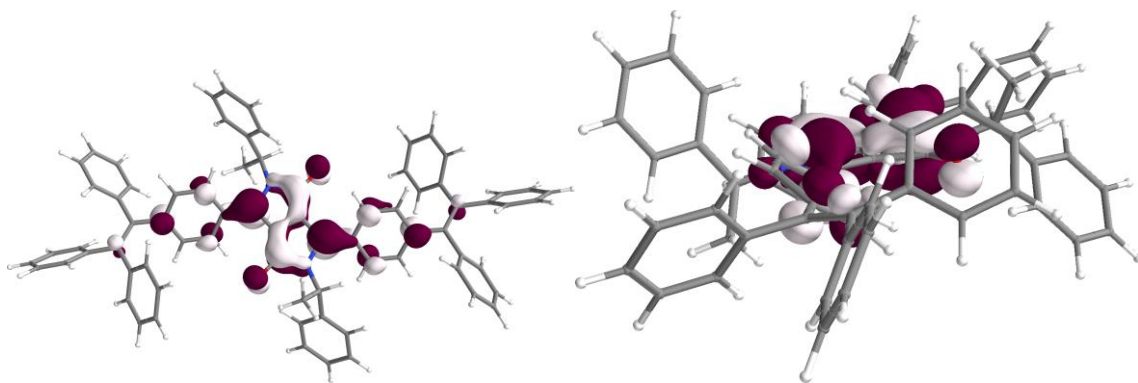

**Fig. S35** Representation of the LUMO of **355** from two points of view.

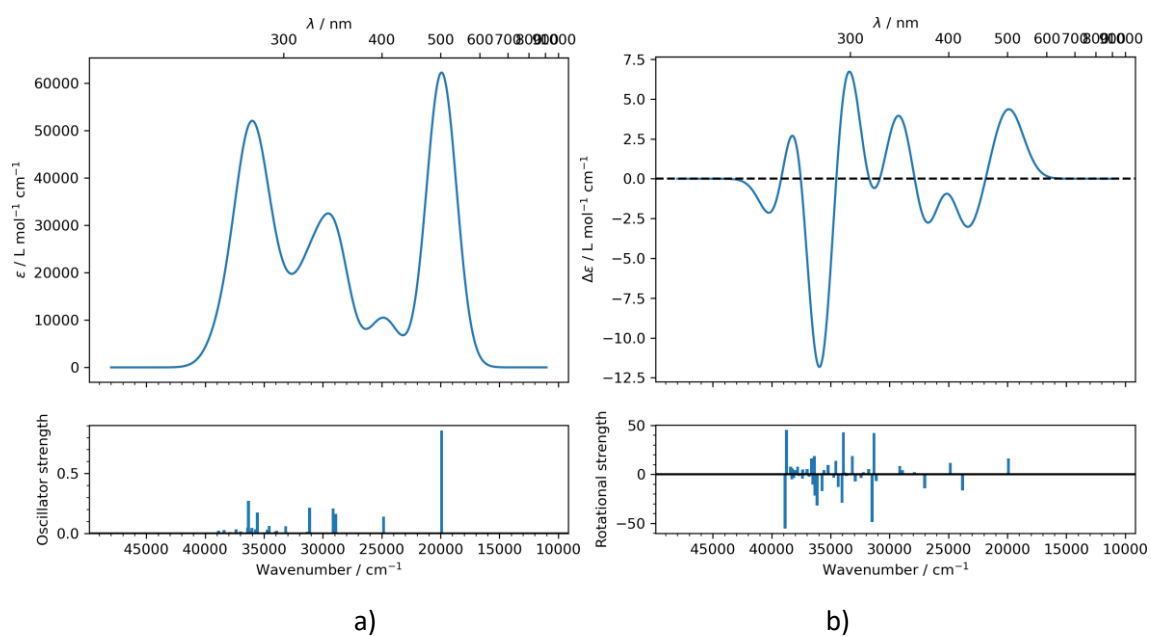

**Fig. S36** Simulated spectra for compound **355**, obtained with gaussian broadening (FWHM = 3000  $\text{cm}^{-1}$ ): *a*) UV-visible absorption and *b*) Circular Dichroism spectrum.

## Compound 8

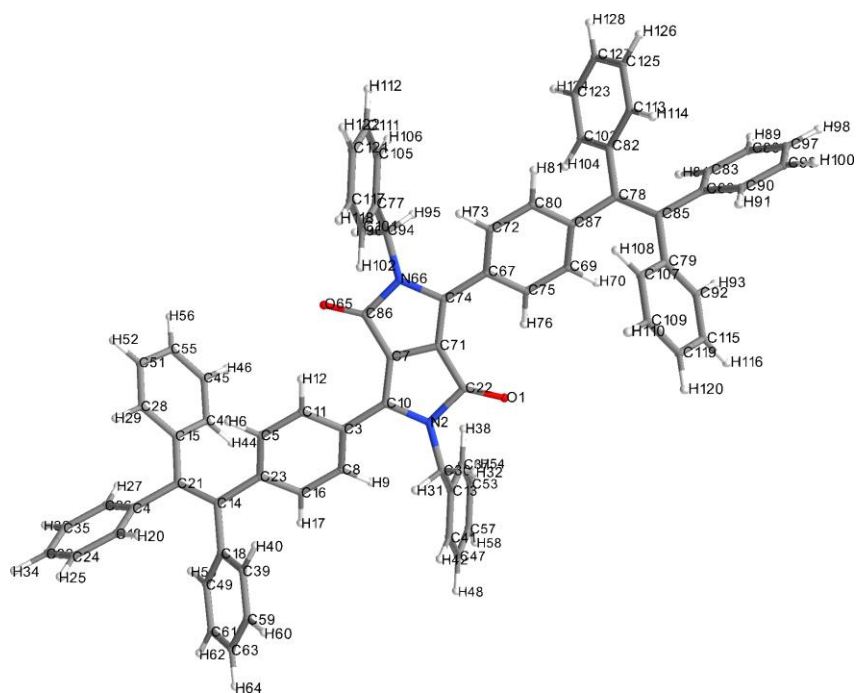

**Fig. S37** Optimized geometry of compound **8** with atom numbering scheme.

|                                        |                      |
|----------------------------------------|----------------------|
| Total molecular energy                 | -3032.29162 hartrees |
| HOMO number                            | 257                  |
| LUMO+1 energies                        | -1.56 eV             |
| LUMO energies                          | -2.57 eV             |
| HOMO energies                          | -5.39 eV             |
| HOMO-1 energies                        | -5.94 eV             |
| Geometry optimization specific results |                      |
| Converged nuclear repulsion energy     | 10779.04579 Hartrees |

Table. Results concerning the calculated mono-electronic excitations

| E.S. | Symmetry  | nm  | cm-1  | f     | R      | Lambda | dCT   | qCT  | Excitation description in %                                                                               |
|------|-----------|-----|-------|-------|--------|--------|-------|------|-----------------------------------------------------------------------------------------------------------|
| 1    | Singlet-A | 521 | 19158 | 0.988 | -0.635 | 0.82   | 0.14  | 0.42 | 257->258 (98)                                                                                             |
| 2    | Singlet-A | 428 | 23318 | 0.000 | 0.651  | 0.45   | 0.68  | 0.80 | 256->258 (97)                                                                                             |
| 3    | Singlet-A | 410 | 24378 | 0.136 | -0.365 | 0.62   | 0.73  | 0.64 | 255->258 (96)                                                                                             |
| 4    | Singlet-A | 374 | 26716 | 0.000 | 1.583  | 0.65   | 2.76  | 0.59 | 248->258 (2) 256->260 (2) 257->259 (91)                                                                   |
| 5    | Singlet-A | 357 | 27977 | 0.000 | -0.004 | 0.38   | 4.81  | 0.73 | 244->258 (3) 246->258 (5) 248->258 (39) 250->258 (5) 252->258 (36) 257->259 (4)                           |
| 6    | Singlet-A | 346 | 28873 | 0.292 | -1.551 | 0.59   | 2.74  | 0.60 | 256->259 (5) 257->260 (86)                                                                                |
| 7    | Singlet-A | 340 | 29397 | 0.029 | -0.118 | 0.39   | 0.49  | 0.66 | 236->258 (2) 237->258 (9) 241->258 (30) 243->258 (12) 245->258 (15) 247->258 (17) 257->260 (4)            |
| 8    | Singlet-A | 320 | 31194 | 0.237 | -9.379 | 0.75   | 2.43  | 0.34 | 255->260 (12) 256->259 (75) 257->260 (5)                                                                  |
| 9    | Singlet-A | 320 | 31194 | 0.008 | 8.212  | 0.40   | 16.67 | 0.62 | 234->258 (4) 240->258 (4) 246->258 (5) 248->258 (22) 252->258 (7) 254->258 (40) 256->259 (2) 257->262 (3) |
| 10   | Singlet-A | 316 | 31576 | 0.005 | 0.910  | 0.34   | 14.48 | 0.65 | 237->258 (3) 239->258 (2) 247->258 (6) 249->258 (15) 251->258 (5) 253->258 (50) 257->263 (6)              |
| 11   | Singlet-A | 316 | 31606 | 0.000 | 0.495  | 0.75   | 1.39  | 0.36 | 255->259 (53) 256->260 (29) 257->261 (11)                                                                 |
| 12   | Singlet-A | 313 | 31901 | 0.000 | 0.080  | 0.37   | 4.37  | 0.69 | 234->258 (2) 246->258 (17) 248->258 (18) 250->258 (9) 252->258 (33) 254->258 (9) 257->262 (3)             |
| 13   | Singlet-A | 312 | 31971 | 0.007 | -0.043 | 0.25   | 2.42  | 0.84 | 247->258 (9) 249->258 (78) 253->258 (7)                                                                   |
| 14   | Singlet-A | 308 | 32461 | 0.000 | 0.134  | 0.62   | 2.66  | 0.38 | 246->258 (7) 254->258 (2) 255->259 (13) 257->261 (65)                                                     |
| 15   | Singlet-A | 305 | 32749 | 0.051 | -0.290 | 0.35   | 20.42 | 0.59 | 237->258 (6) 241->258 (6) 247->258 (26) 251->258 (27) 253->258 (14) 257->263 (9)                          |

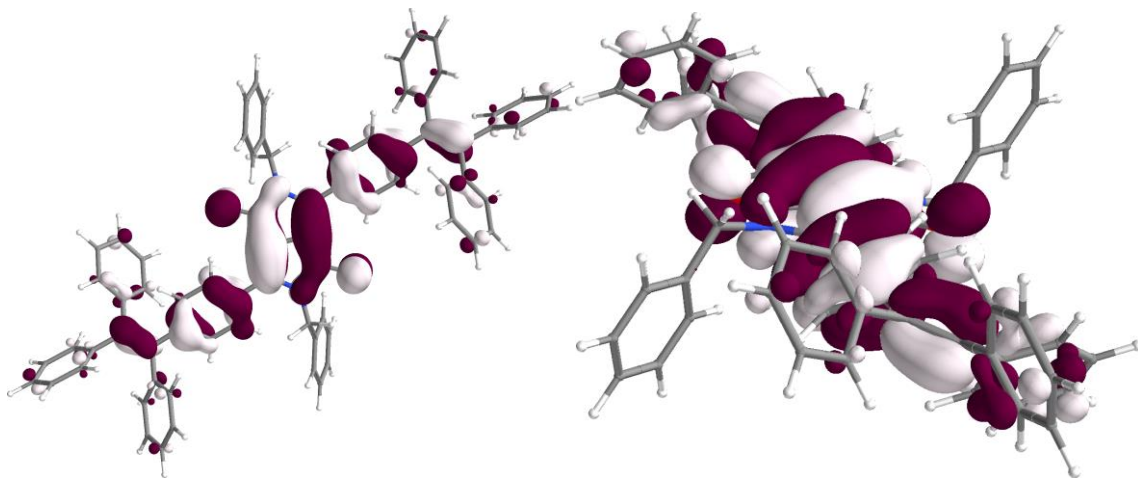

Fig. S38 Representation of the HOMO of 8 from two points of view.



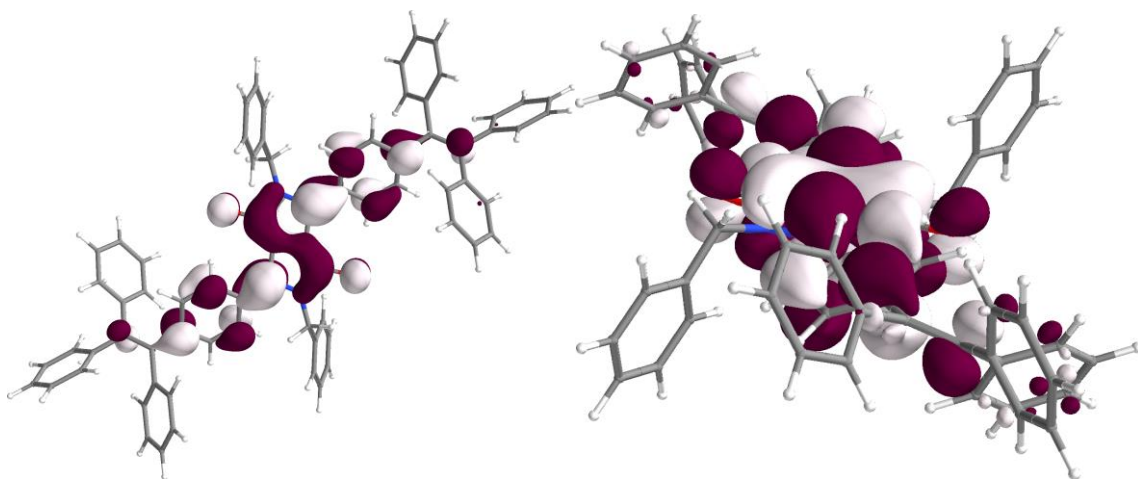

**Fig. S39** Representation of the LUMO of **8** from two points of view.

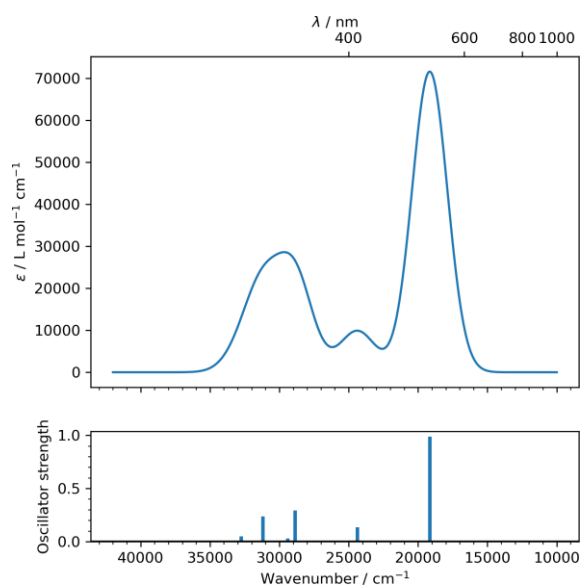

**Fig. S40** Simulated UV-visible absorption spectrum for compound **8**, obtained with gaussian broadening (FWHM = 3000 cm<sup>-1</sup>).

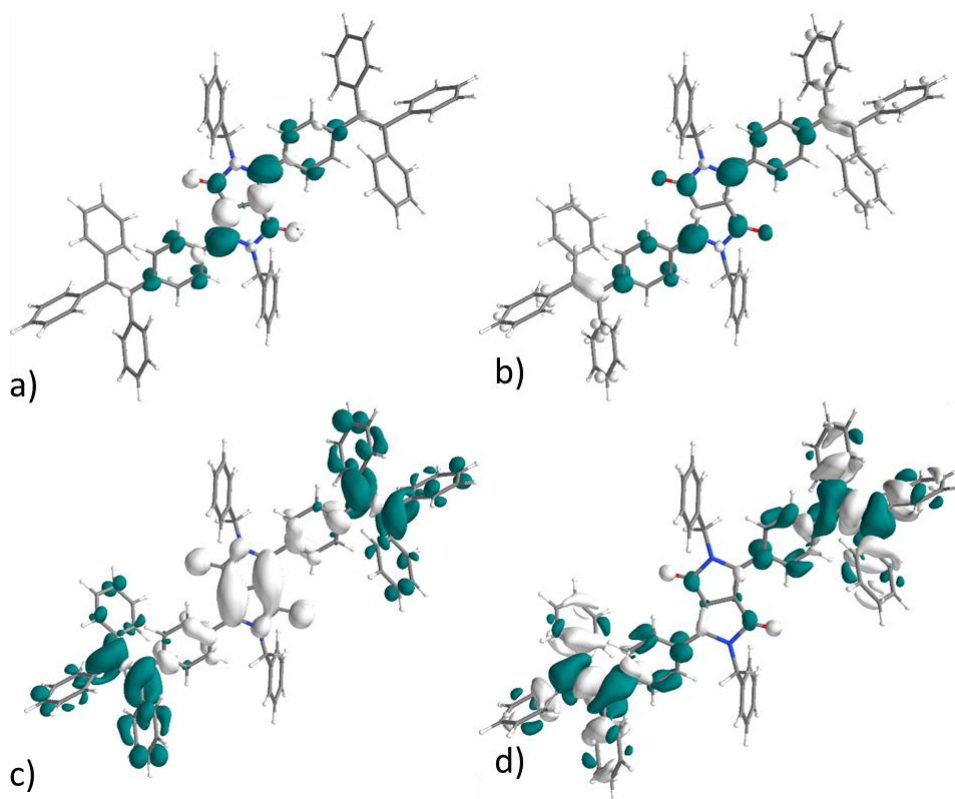

**Fig. S41** Representation of the Electron Density Difference (EDD) associated to the strongest transitions calculated for the compound **8**: a) S0-S1; b) S0-S3; c) S0-S6; d) S0-S8; excited electrons and holes indicated by green and white surfaces, respectively.

## UV-vis spectroscopy and CPL measurements

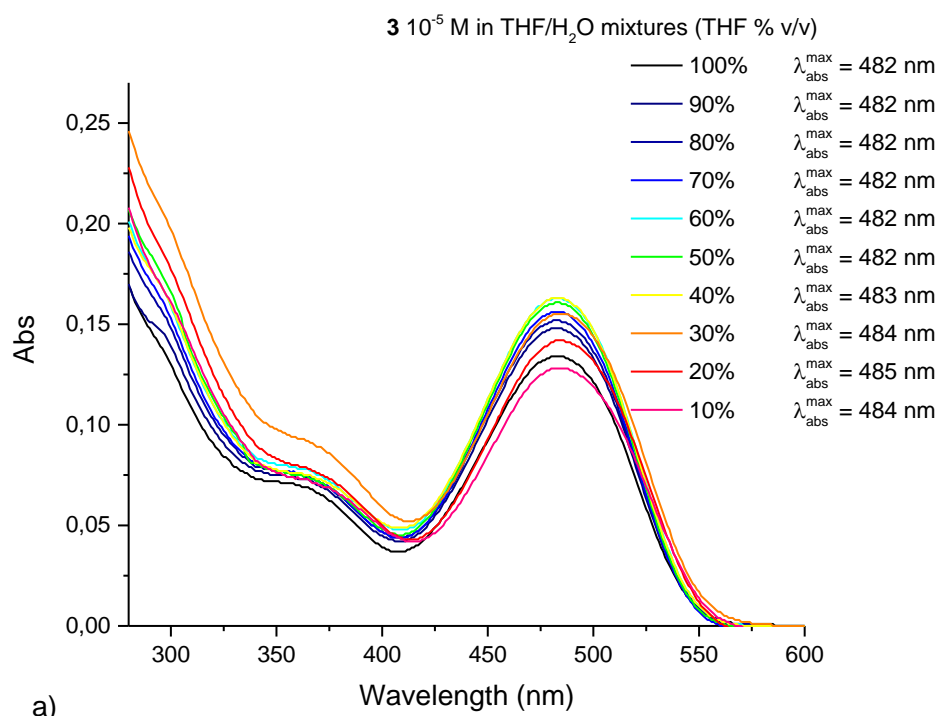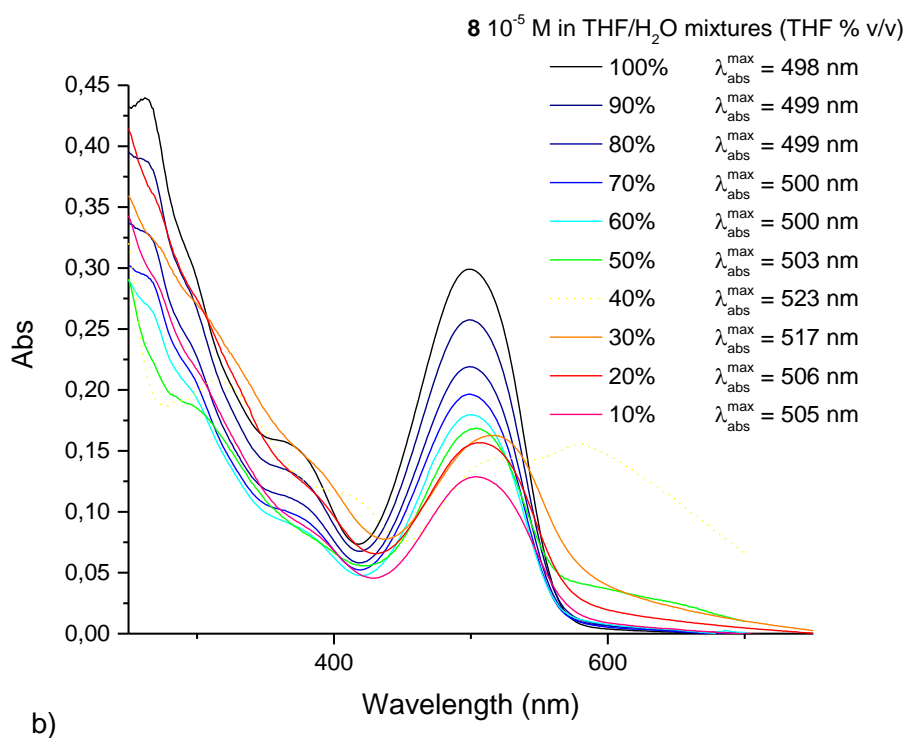

**Fig. S42** UV-visible absorption spectra of compounds **3** and **8** in THF/water mixtures: a) absorption spectra of **3** in a series of THF/water mixtures, from 100% THF (black line) to 10% THF (red line), showing little solvatochromism; d) absorption spectra of **8** in a series of THF/water mixtures, from 100% THF (black line) to 10% THF (red line), showing important variations due to precipitation as water fraction increases; at 40% THF the measurements are heavily affected by scattering.

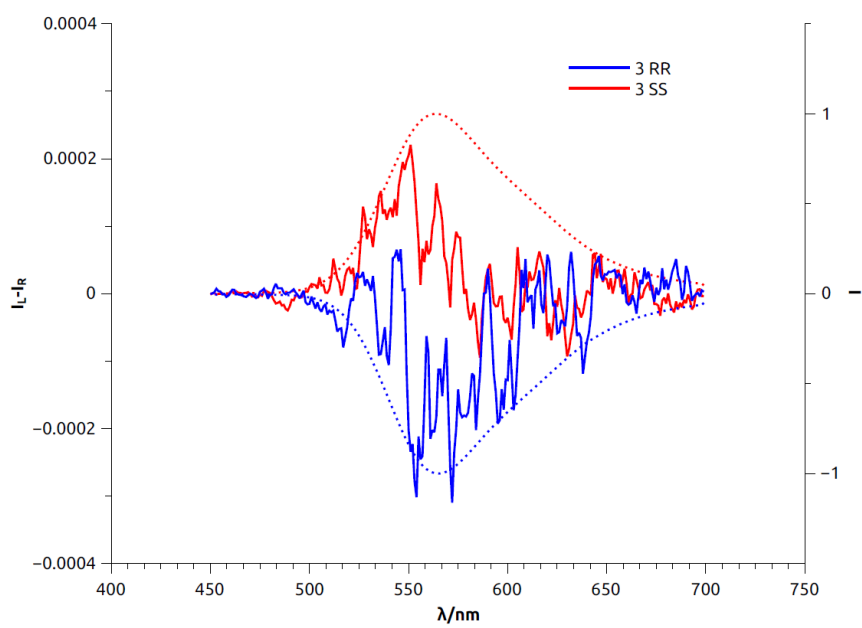

**Fig. S43** CPL signal measured for compounds **3RR** (blue lines) and **3SS** (red lines) in  $\text{CHCl}_3$  solution ( $10^{-6}$  M,  $\lambda_{\text{exc}} = 365$  nm) where the emission traces (original and inverted one) are overlapped with CPL curves.
